# Supplementary material
Source: Research Square preprint supplement (doi:10.21203/rs.3.rs-9165617/v1)
Supplement: Supplementary file 1 [file 3ee6637a5d600687184c95f0.docx]

**Scheme 1** Chemical reaction during the two stages of fermentation, **a**) alcoholic fermentation and **b**) post-alcoholic fermentation.
