# Supplementary material
Source: Research Square preprint supplement (doi:10.21203/rs.3.rs-9165617/v1)
Supplement: Supplementary file 2 [file efe71b6a4a0e0981763bbd34.docx]

**Supplementary**

**Statistical Drivers of the Sugar-to-Ethanol Transition in Nipa Palm Sap: A Heatmap-Based Correlation of the Metabolic Pivot**

**Zainab Ngainia*, Muhammad Jeffrya, Ana Sakura Zainal Abidinb*, Muzamil Ayoubb, Kasumawati Liasb, Rasli Muslimenb, Vannessa Lawaia, Mohamad Sinosic**

*aFaculty of Resource Science & Technology, Universiti Malaysia Sarawak, 94300 Kota Samarahan, Sarawak, Malaysia.*

*bDepartment of Mechanical Engineering, Faculty of Engineering, Universiti Malaysia Sarawak, 94300 Kota Samarahan, Sarawak, Malaysia.*

*cPejabat Agama Islam Bahagian Samarahan, Jalan Masjid Muttaqin, 94300 Kota Samarahan, Sarawak, Malaysia.*

**Corresponding author:* [zaasakura@unimas.my](mailto:nzainab@unimas.my), [nzainab@unimas.my](mailto:nzainab@unimas.my)

**Table S1** Data of Physicochemical Parameters during Aerobic Fermentation of Nipa Palm Sap in 60 days.

| **Sampling**  **Location** | **Day** | **Replicate** | **Ethanol**  **(%v/v)** | **Mean Ethanol ± SD** | **pH** | **Mean pH ± SD** | **Sucrose**  **(°Brix)** | **Mean Sucrose ± SD** | **Sugar Peak**  **Height** | **Sugar Peak Height ± SD** | **Total Dissolved Solids**  **(ppm)** | **Total Dissolved Solids ± SD** |
| --- | --- | --- | --- | --- | --- | --- | --- | --- | --- | --- | --- | --- |
| **Tambirat** | **0** | **A** | 0.07 | 0.06 ± 0.01 | 5.58 | 5.56 ± 0.30 | 18.7 | 18.17 ± 0.68 | 284322 | 266486 ± 22460 | 2031 | 2172 ± 99 |
| **B** | 0.05 | 5.85 | 17.4 | 273873 | 2242 |
| **C** | 0.07 | 5.25 | 18.4 | 241263 | 2242 |
| **1** | **A** | 1.06 | 0.72 ± 0.31 | 4 | 3.99 ± 0.02 | 17.1 | 16.57 ± 0.61 | 201399 | 203740 ± 2492 | 2736 | 3188 ± 321 |
| **B** | 0.64 | 3.97 | 15.9 | 203463 | 3448 |
| **C** | 0.46 | 3.99 | 16.7 | 206359 | 3380 |
| **2** | **A** | 5.82 | 5.73 ± 0.09 | 4.03 | 3.98 ± 0.09 | 11.5 | 11.73 ± 0.40 | 119734 | 126444 ± 7314 | 3347 | 3414 ± 55 |
| **B** | 5.73 | 3.88 | 11.5 | 125357 | 3482 |
| **C** | 5.63 | 4.04 | 12.2 | 134241 | 3413 |
| **3** | **A** | 7.84 | 7.73 ± 0.25 | 3.98 | 3.94 ± 0.04 | 9.7 | 9.57 ± 0.12 | 76290 | 73858 ± 2204 | 3446 | 3470 ± 17 |
| **B** | 7.44 | 3.9 | 9.5 | 71993 | 3482 |
| **C** | 7.90 | 3.94 | 9.5 | 73291 | 3482 |
| **4** | **A** | 7.91 | 7.98 ± 0.45 | 3.85 | 3.88 ± 0.05 | 9 | 9.00 ± 0.10 | 69661 | 71431 ± 1643 | 3552 | 3542 ± 45 |
| **B** | 8.46 | 3.94 | 9.1 | 71724 | 3482 |
| **C** | 7.57 | 3.85 | 8.9 | 72908 | 3592 |
| **5** | **A** | 7.81 | 7.80 ± 0.30 | 3.93 | 3.94 ± 0.01 | 8.9 | 8.90 ± 0.10 | 72208 | 71645 ± 1019 | 3555 | 3518 ± 30 |
| **B** | 8.10 | 3.95 | 8.8 | 72259 | 3481 |
| **C** | 7.50 | 3.93 | 9 | 70469 | 3518 |
| **6** | **A** | 6.59 | 6.93 ± 0.38 | 3.78 | 3.75 ± 0.03 | 8.9 | 8.93 ± 0.06 | 73671 | 71725 ± 1758 | 3632 | 3556 ± 54 |
| **B** | 6.88 | 3.75 | 9 | 70252 | 3518 |
| **C** | 7.34 | 3.73 | 8.9 | 71252 | 3518 |
| **7** | **A** | 6.07 | 5.77 ± 0.77 | 3.64 | 3.73 ± 0.08 | 8.9 | 8.87 ± 0.06 | 71951 | 71679 ± 251 | 3593 | 3619 ± 37 |
| **B** | 6.35 | 3.79 | 8.9 | 71457 | 3593 |
| **C** | 4.90 | 3.76 | 8.8 | 71629 | 3671 |
| **8** | **A** | 5.14 | 5.10 ± 0.21 | 3.76 | 3.75 ± 0.01 | 9 | 8.90 ± 0.10 | 74150 | 72105 ± 2318 | 3593 | 3607 ± 18 |
| **B** | 4.88 | 3.74 | 8.9 | 72579 | 3595 |
| **C** | 5.29 | 3.76 | 8.8 | 69587 | 3632 |
| **9** | **A** | 4.69 | 3.94 ± 0.77 | 3.6 | 3.60 ± 0.03 | 8.1 | 8.47 ± 0.32 | 74825 | 73225 ± 1424 | 3595 | 3648 ± 50 |
| **B** | 3.15 | 3.57 | 8.6 | 72098 | 3714 |
| **C** | 3.99 | 3.63 | 8.7 | 72752 | 3634 |
| **10** | **A** | 3.23 | 2.79 ± 0.43 | 3.45 | 3.44 ± 0.04 | 8 | 8.03 ± 0.06 | 65817 | 64071 ± 1641 | 3752 | 3739 ± 18 |
| **B** | 2.78 | 3.4 | 8.1 | 62560 | 3752 |
| **C** | 2.36 | 3.47 | 8 | 63835 | 3714 |

**Table** *Continued*

| **Sampling Location** | **Day** | **Replicate** | **Ethanol**  **(%v/v)** | **Mean Ethanol ± SD** | **pH** | **Mean pH ± SD** | **Sucrose**  **(°Brix)** | **Mean Sucrose ± SD** | **Sugar Peak**  **Height** | **Sugar Peak Height ± SD** | **Total Dissolved Solids**  **(ppm)** | **Total Dissolved Solids ± SD** |
| --- | --- | --- | --- | --- | --- | --- | --- | --- | --- | --- | --- | --- |
| **Tambirat** | **11** | **A** | 1.55 | 4.53 ± 0.47 | 3.4 | 3.45 ± 0.07 | 8.6 | 8.27 ± 0.35 | 63615 | 63241 ± 1103 | 3908 | 3908 ± 0 |
| **B** | 2.70 | 3.53 | 7.9 | 62000 | 3908 |
| **C** | 2.42 | 3.42 | 8.3 | 64109 | 3908 |
| **12** | **A** | 2.10 | 4.84 ± 0.25 | 3.53 | 3.55 ± 0.02 | 8.3 | 8.07 ± 0.25 | 67095 | 63584 ± 4265 | 3916 | 3916 ± 0 |
| **B** | 0.03 | 3.54 | 7.8 | 58837 | 3916 |
| **C** | 2.09 | 3.57 | 8.1 | 64820 | 3916 |
| **13** | **A** | 0.77 | 5.78 ± 0.27 | 3.49 | 3.50 ± 0.01 | 8.2 | 8.03 ± 0.29 | 66232 | 64767 ± 1709 | 3873 | 3873 ± 0 |
| **B** | 0.11 | 3.5 | 7.7 | 65179 | 3873 |
| **C** | 1.12 | 3.51 | 8.2 | 62889 | 3873 |
| **14** | **A** | 1.76 | 5.20 ± 0.24 | 3.39 | 3.40 ± 0.05 | 7.9 | 7.33 ± 0.49 | 59960 | 56325 ± 3177 | 3916 | 3916 ± 0 |
| **B** | 0.02 | 3.45 | 7 | 54935 | 3916 |
| **C** | 0.04 | 3.35 | 7.1 | 54079 | 3916 |
| **15** | **A** | 0.09 | 0.09 ± 0.02 | 3.4 | 3.39 ± 0.05 | 8.5 | 8.33 ± 0.15 | 71089 | 69537 ± 1963 | 3873 | 3941 ± 89 |
| **B** | 0.07 | 3.43 | 8.2 | 67331 | 4041 |
| **C** | 0.10 | 3.33 | 8.3 | 70192 | 3908 |
| **16** | **A** | 0.11 | 0.09 ± 0.02 | 3.55 | 3.42 ± 0.12 | 7.9 | 7.90 ± 0.20 | 63554 | 62567 ± 2462 | 3880 | 3819 ± 53 |
| **B** | 0.08 | 3.38 | 8.1 | 64384 | 3788 |
| **C** | 0.07 | 3.32 | 7.7 | 59765 | 3788 |
| **17** | **A** | 0.09 | 0.10 ± 0.04 | 3.31 | 3.32 ± 0.04 | 8 | 8.07 ± 0.12 | 60576 | 64530 ± 3997 | 3873 | 3781 ± 231 |
| **B** | 0.14 | 3.36 | 8 | 64446 | 3952 |
| **C** | 0.07 | 3.29 | 8.2 | 68569 | 3518 |
| **18** | **A** | 0.15 | 0.09 ± 0.05 | 3.36 | 3.32 ± 0.03 | 8.5 | 8.23 ± 0.25 | 68307 | 68314 ± 1941 | 3908 | 3937 ± 25 |
| **B** | 0.06 | 3.3 | 8 | 66378 | 3952 |
| **C** | 0.06 | 3.31 | 8.2 | 70259 | 3952 |
| **19** | **A** | 0.04 | 0.06 ± 0.02 | 3.43 | 3.42 ± 0.03 | 8.2 | 7.93 ± 0.31 | 68614 | 64332 ± 3711 | 3923 | 3990 ± 60 |
| **B** | 0.08 | 3.39 | 8 | 62042 | 4041 |
| **C** | 0.05 | 3.44 | 7.6 | 62340 | 4005 |
| **20** | **A** | 0.08 | 0.06 ± 0.03 | 3.45 | 3.43 ± 0.02 | 7.9 | 7.83 ± 0.15 | 62838 | 61347 ± 2114 | 4015 | 4063 ± 42 |
| **B** | 0.07 | 3.42 | 7.8 | 62276 | 4087 |
| **C** | 0.02 | 3.43 | 7.8 | 58928 | 4087 |

**Table** *Continued*

| **Sampling**  **Location** | **Day** | **Replicate** | **Ethanol**  **(%v/v)** | **Mean Ethanol ± SD** | **pH** | **Mean pH ± SD** | **Sucrose**  **(°Brix)** | **Mean Sucrose ± SD** | **Sugar Peak**  **Height** | **Sugar Peak Height ± SD** | **Total Dissolved Solids**  **(ppm)** | **Total Dissolved Solids ± SD** |
| --- | --- | --- | --- | --- | --- | --- | --- | --- | --- | --- | --- | --- |
| **Tambirat** | **21** | **A** | 0.08 | 4.80 ± 0.31 | 3.49 | 3.46 ± 0.03 | 7.8 | 7.83 ± 0.15 | 61673 | 62777 ± 2987 | 3886 | 3929 ± 42 |
| **B** | 0.07 | 3.46 | 8 | 60499 | 3969 |
| **C** | 0.02 | 3.44 | 7.7 | 66159 | 3931 |
| **22** | **A** | 0.05 | 4.49 ± 0.45 | 3.48 | 3.44 ± 0.03 | 7.5 | 7.67 ± 0.15 | 56118 | 58156 ± 2785 | 4062 | 4049 ± 92 |
| **B** | 0.05 | 3.42 | 7.8 | 57021 | 3952 |
| **C** | 0.01 | 3.43 | 7.7 | 61329 | 4134 |
| **23** | **A** | 0.07 | 4.53 ± 0.68 | 3.47 | 3.47 ± 0.02 | 7.6 | 7.53 ± 0.21 | 55815 | 55932 ± 3998 | 3931 | 3956 ± 22 |
| **B** | 0.04 | 3.46 | 7.3 | 51994 | 3969 |
| **C** | 0.04 | 3.49 | 7.7 | 59988 | 3969 |
| **24** | **A** | 0.06 | 3.88 ± 0.61 | 3.5 | 3.51 ± 0.03 | 7.2 | 7.17 ± 0.06 | 53148 | 53370 ± 2599 | 3977 | 3990 ± 22 |
| **B** | 0.09 | 3.54 | 7.1 | 50889 | 3977 |
| **C** | 0.00 | 3.48 | 7.2 | 56072 | 4015 |
| **25** | **A** | 0.00 | 4.80 ± 0.64 | 3.56 | 3.48 ± 0.12 | 7.5 | 7.67 ± 0.07 | 58189 | 62996 ± 4981 | 3931 | 3926 ± 5 |
| **B** | 0.05 | 3.53 | 7.4 | 62664 | 3923 |
| **C** | 0.05 | 3.34 | 8.1 | 68134 | 3923 |
| **26** | **A** | 0.00 | 3.78 ± 0.70 | 3.58 | 3.57 ± 0.01 | 7.3 | 7.47 ± 0.15 | 51731 | 57029 ± 5458 | 3977 | 3993 ± 28 |
| **B** | 0.01 | 3.57 | 7.5 | 56722 | 3977 |
| **C** | 0.00 | 3.57 | 7.6 | 62635 | 4025 |
| **27** | **A** | 0.10 | 4.09 ± 0.74 | 3.55 | 3.52 ± 0.03 | 7.5 | 7.13 ± 0.40 | 57242 | 55427 ± 2643 | 3893 | 3918 ± 22 |
| **B** | 0.07 | 3.53 | 6.7 | 52395 | 3931 |
| **C** | 0.00 | 3.49 | 7.2 | 56644 | 3931 |
| **28** | **A** | 0.01 | 2.87 ± 0.07 | 3.62 | 3.62 ± 0.02 | 7.1 | 7.00 ± 0.10 | 56886 | 59270 ± 2691 | 4072 | 4009 ± 72 |
| **B** | 0.01 | 3.64 | 6.9 | 58736 | 4025 |
| **C** | 0.03 | 3.61 | 7 | 62188 | 3931 |
| **29** | **A** | 0.00 | 3.16 ± 0.61 | 3.54 | 3.59 ± 0.04 | 6.8 | 6.83 ± 0.35 | 57443 | 57170 ± 6655 | 4062 | 4062 ± 0 |
| **B** | 0.00 | 3.61 | 6.5 | 50382 | 4062 |
| **C** | 0.01 | 3.61 | 7.2 | 63684 | 4062 |
| **30** | **A** | 0.00 | 3.78 ± 0.61 | 3.75 | 3.72 ± 0.03 | 7.3 | 7.27 ± 0.06 | 53790 | 54726 ± 1386 | 3969 | 3979 ± 69 |
| **B** | 0.00 | 3.72 | 7.3 | 56318 | 3916 |
| **C** | 0.00 | 3.69 | 7.2 | 54070 | 4052 |

**Table** *Continued*

| **Sampling**  **Location** | **Day** | **Replicate** | **Ethanol**  **(%v/v)** | **Mean Ethanol ± SD** | **pH** | **Mean pH ± SD** | **Sucrose**  **(°Brix)** | **Mean Sucrose ± SD** | **Sugar Peak**  **Height** | **Sugar Peak Height ± SD** | **Total Dissolved Solids**  **(ppm)** | **Total Dissolved Solids ± SD** |
| --- | --- | --- | --- | --- | --- | --- | --- | --- | --- | --- | --- | --- |
| **Tambirat** | **31** | **A** | 0.00 | 0.00 ± 0 | 3.75 | 3.76 ± 0.01 | 7.3 | 7.23 ± 0.40 | 56814 | 59213 ± 2513 | 3916 | 3975 ± 51 |
| **B** | 0.00 | 3.77 | 6.8 | 61826 | 4005 |
| **C** | 0.00 | 3.75 | 7.6 | 58998 | 4005 |
| **32** | **A** | 0.00 | 0.00 ± 0 | 3.73 | 3.71 ± 0.02 | 7 | 7.20 ± 0.20 | 62041 | 64116 ± 5505 | 4005 | 4005 ± 0 |
| **B** | 0.00 | 3.71 | 7.2 | 59949 | 4005 |
| **C** | 0.00 | 3.70 | 7.4 | 70357 | 4005 |
| **33** | **A** | 0.00 | 0.00 ± 0 | 3.79 | 3.80 ± 0.01 | 7 | 6.87 ± 0.51 | 49503 | 57477 ± 8221 | 4099 | 4099 ± 0 |
| **B** | 0.00 | 3.81 | 7.3 | 65924 | 4099 |
| **C** | 0.00 | 3.80 | 6.3 | 57004 | 4099 |
| **34** | **A** | 0.00 | 0.00 ± 0.01 | 3.81 | 3.75 ± 0.06 | 6.9 | 6.8 ± 0.10 | 54603 | 53554 ± 2317 | 4072 | 4072 ± 0 |
| **B** | 0.01 | 3.75 | 6.8 | 50898 | 4072 |
| **C** | 0.00 | 3.70 | 6.7 | 55162 | 4072 |
| **35** | **A** | 0.00 | 0.00 ± 0.01 | 3.80 | 3.77 ± 0.09 | 6.3 | 6.43 ± 0.15 | 61115 | 57388 ± 5286 | 4159 | 4159 ± 0 |
| **B** | 0.00 | 3.67 | 6.6 | 51338 | 4159 |
| **C** | 0.00 | 3.83 | 6.4 | 59710 | 4159 |
| **36** | **A** | 0.02 | 0.02 ± 0.02 | 3.95 | 3.97 ± 0.02 | 6.5 | 6.43 ± 0.21 | 59685 | 60430 ± 5148 | 4072 | 4072 ± 0 |
| **B** | 0.00 | 3.99 | 6.6 | 65910 | 4072 |
| **C** | 0.03 | 3.96 | 6.2 | 55695 | 4072 |
| **37** | **A** | 0.00 | 0.00 ± 0 | 3.99 | 4.00 ± 0.01 | 6.2 | 6.53 ± 0.42 | 57451 | 60333 ± 6212 | 4025 | 4058 ± 29 |
| **B** | 0.00 | 4.01 | 6.4 | 56085 | 4075 |
| **C** | 0.00 | 3.99 | 7 | 67462 | 4075 |
| **38** | **A** | 0.00 | 0.00 ± 0 | 4.07 | 4.01 ± 0.05 | 5.4 | 6.13 ± 0.70 | 56468 | 60564 ± 3712 | 3808 | 3986 ± 154 |
| **B** | 0.00 | 3.98 | 6.8 | 61519 | 4075 |
| **C** | 0.00 | 3.98 | 6.2 | 63705 | 4075 |
| **39** | **A** | 0.00 | 0.00 ± 0 | 3.91 | 3.86 ± 0.06 | 6.2 | 6.80 ± 0.53 | 55748 | 56154 ± 1981 | 3969 | 4023 ± 53 |
| **B** | 0.00 | 3.88 | 7 | 54407 | 4025 |
| **C** | 0.00 | 3.80 | 7.2 | 58306 | 4075 |
| **40** | **A** | 0.00 | 0.00 ± 0 | 4.05 | 4.03 ± 0.03 | 6.1 | 6.07 ± 0.06 | 51253 | 52915 ± 1458 | 4134 | 4134 ± 0 |
| **B** | 0.00 | 4.04 | 6 | 53977 | 4134 |
| **C** | 0.00 | 4.00 | 6.1 | 53516 | 4134 |

**Table** *Continued*

| **Sampling**  **Location** | **Day** | **Replicate** | **Ethanol**  **(%v/v)** | **Mean Ethanol ± SD** | **pH** | **Mean pH ± SD** | **Sucrose**  **(°Brix)** | **Mean Sucrose ± SD** | **Sugar Peak**  **Height** | **Sugar Peak Height ± SD** | **Total Dissolved Solids**  **(ppm)** | **Total Dissolved Solids ± SD** |
| --- | --- | --- | --- | --- | --- | --- | --- | --- | --- | --- | --- | --- |
| **Tambirat** | **41** | **A** | 0.00 | 0.00 ± 0 | 3.99 | 3.98 ± 0.02 | 5.9 | 6.00 ± 0.17 | 59338 | 59015 ± 5757 | 4134 | 4134 ± 0 |
| **B** | 0.00 | 3.95 | 6.2 | 53103 | 4134 |
| **C** | 0.00 | 3.99 | 5.9 | 64604 | 4134 |
| **42** | **A** | 0.00 | 0.00 ± 0 | 4.06 | 4.04 ± 0.02 | 6.5 | 6.30 ± 0.20 | 62187 | 54737 ± 6809 | 3752 | 3752 ± 0 |
| **B** | 0.00 | 4.03 | 6.1 | 53187 | 3752 |
| **C** | 0.00 | 4.04 | 6.3 | 48837 | 3752 |
| **43** | **A** | 0.00 | 0.17 ± 0.30 | 3.91 | 3.85 ± 0.06 | 5.7 | 5.47 ± 0.25 | 41461 | 37352 ± 5661 | 4122 | 4122 ± 0 |
| **B** | 0.00 | 3.79 | 5.5 | 39701 | 4122 |
| **C** | 0.52 | 3.85 | 5.2 | 30895 | 4122 |
| **44** | **A** | 0.00 | 0.00 ± 0 | 4.14 | 4.11 ± 0.03 | 5.8 | 5.70 ± 0.17 | 63656 | 54521 ± 13341 | 4083 | 4083 ± 0 |
| **B** | 0.00 | 4.08 | 5.8 | 60695 | 4083 |
| **C** | 0.00 | 4.11 | 5.5 | 39211 | 4083 |
| **45** | **A** | 0.00 | 0.00 ± 0 | 3.93 | 3.96 ± 0.06 | 6 | 5.87 ± 0.15 | 63038 | 62676 ± 612 | 4083 | 4083 ± 0 |
| **B** | 0.00 | 3.99 | 5.9 | 63021 | 4083 |
| **C** | 0.00 | 3.95 | 5.7 | 61970 | 4083 |
| **46** | **A** | 0.00 | 0.01 ± 0.02 | 3.80 | 3.86 ± 0.06 | 5.1 | 5.33 ± 0.21 | 43928 | 54730 ± 9355 | 4122 | 4122 ± 0 |
| **B** | 0.03 | 3.91 | 5.4 | 60228 | 4122 |
| **C** | 0.00 | 3.85 | 5.5 | 60033 | 4122 |
| **47** | **A** | 0.00 | 0.00 ± 0 | 4.15 | 4.11 ± 0.04 | 5.8 | 5.93 ± 0.12 | 60582 | 59838 ± 5434 | 4172 | 4172 ± 0.04 |
| **B** | 0.00 | 4.10 | 6 | 64861 | 4172 |
| **C** | 0.00 | 4.08 | 6 | 54070 | 4172 |
| **48** | **A** | 0.00 | 0.00 ± 0 | 4.01 | 4.02 ± 0.08 | 5.6 | 5.77 ± 0.15 | 53723 | 57077 ± 3127 | 4133 | 4129 ± 45 |
| **B** | 0.00 | 4.11 | 5.9 | 59911 | 4172 |
| **C** | 0.00 | 3.95 | 5.8 | 57597 | 4083 |
| **49** | **A** | 0.00 | 0.00 ± 0 | 4.13 | 4.14 ± 0.05 | 5.7 | 5.93 ± 0.25 | 58923 | 55200 ± 12874 | 4172 | 4172 ± 0 |
| **B** | 0.00 | 4.10 | 6.2 | 65802 | 4172 |
| **C** | 0.00 | 4.19 | 5.9 | 40874 | 4172 |
| **50** | **A** | 0.00 | 0.00 ± 0 | 4.05 | 4.07 ± 0.03 | 5.5 | 5.70 ± 0.35 | 58265 | 56730 ± 1573 | 4122 | 4147 ± 34 |
| **B** | 0.00 | 4.11 | 6.1 | 56805 | 4133 |
| **C** | 0.00 | 4.06 | 5.5 | 55121 | 4185 |

**Table** *Continued*

| **Sampling**  **Location** | **Day** | **Replicate** | **Ethanol**  **(%v/v)** | **Mean Ethanol ± SD** | **pH** | **Mean pH ± SD** | **Sucrose**  **(°Brix)** | **Mean Sucrose ± SD** | **Sugar Peak**  **Height** | **Sugar Peak Height ± SD** | **Total Dissolved Solids**  **(ppm)** | **Total Dissolved Solids ± SD** |
| --- | --- | --- | --- | --- | --- | --- | --- | --- | --- | --- | --- | --- |
| **Tambirat** | **51** | **A** | 0.00 | 0.00 ± 0 | 3.85 | 3.86 ± 0.11 | 5.5 | 5.57 ± 0.50 | 63201 | 54886 ± 7265 | 4110 | 4107 ± 80 |
| **B** | 0.00 | 3.75 | 6.1 | 49770 | 4025 |
| **C** | 0.00 | 3.97 | 5.1 | 51687 | 4185 |
| **52** | **A** | 0.00 | 0.00 ± 0 | 3.93 | 3.91 ± 0.06 | 6.7 | 5.53 ± 1.02 | 49541 | 50374 ± 8169 | 4025 | 4141 ± 127 |
| **B** | 0.00 | 3.96 | 5.1 | 58928 | 4122 |
| **C** | 0.00 | 3.85 | 4.8 | 42653 | 4276 |
| **53** | **A** | 0.00 | 0.00 ± 0 | 4.19 | 4.19 ± 0.02 | 6.3 | 5.67 ± 0.55 | 64611 | 55414 ± 9986 | 4185 | 4150 ± 30 |
| **B** | 0.00 | 4.18 | 5.3 | 44792 | 4133 |
| **C** | 0.00 | 4.21 | 5.4 | 56839 | 4133 |
| **54** | **A** | 0.00 | 0.00 ± 0 | 4.14 | 4.15 ± 0.02 | 5.3 | 5.83 ± 0.61 | 57046 | 54480 ± 4004 | 4231 | 4200 ± 27 |
| **B** | 0.00 | 4.13 | 5.7 | 56528 | 4185 |
| **C** | 0.00 | 4.17 | 6.5 | 49867 | 4185 |
| **55** | **A** | 0.00 | 0.00 ± 0 | 4.05 | 4.08 ± 0.03 | 4 | 4.90 ± 0.79 | 33845 | 47886 ± 12184 | 4472 | 4311 ± 139 |
| **B** | 0.00 | 4.10 | 5.2 | 55667 | 4231 |
| **C** | 0.00 | 4.10 | 5.5 | 54147 | 4231 |
| **56** | **A** | 0.00 | 0.00 ± 0 | 4.06 | 4.08 ± 0.02 | 5.6 | 5.53 ± 0.21 | 54107 | 46391 ± 8326 | 4367 | 4291 ± 69 |
| **B** | 0.00 | 4.10 | 5.3 | 37567 | 4276 |
| **C** | 0.00 | 4.07 | 5.7 | 47500 | 4231 |
| **57** | **A** | 0.00 | 0.00 ± 0 | 3.90 | 3.90 ± 0.05 | 5.2 | 5.47 ± 0.31 | 57301 | 55612 ± 1583 | 4316 | 4316 ± 0 |
| **B** | 0.00 | 3.95 | 5.4 | 54162 | 4316 |
| **C** | 0.00 | 3.85 | 5.8 | 55372 | 4316 |
| **58** | **A** | 0.00 | 0.00 ± 0 | 3.86 | 3.88 ± 0.03 | 5.6 | 5.53 ± 0.21 | 41567 | 45664 ± 10405 | 4329 | 4329 ± 0 |
| **B** | 0.00 | 3.92 | 5.2 | 37932 | 4329 |
| **C** | 0.00 | 3.87 | 5.8 | 57494 | 4329 |
| **59** | **A** | 0.00 | 0.00 ± 0 | 4.10 | 4.00 ± 0.09 | 6 | 5.13 ± 0.78 | 45017 | 40970 ± 8756 | 4083 | 4225 ± 125 |
| **B** | 0.00 | 3.93 | 4.9 | 30923 | 4276 |
| **C** | 0.00 | 3.98 | 4.5 | 46971 | 4316 |
| **60** | **A** | 0.00 | 0.00 ± 0 | 4.12 | 4.08 ± 0.11 | 4.7 | 4.8 ± 0.66 | 51943 | 53825 ± 4675 | 4185 | 4216 ± 27 |
| **B** | 0.00 | 3.96 | 4.2 | 50384 | 4231 |
| **C** | 0.00 | 4.16 | 5.5 | 59148 | 4231 |

**Table** *Continued*

| **Sampling**  **Location** | **Day** | **Replicate** | **Ethanol**  **(%v/v)** | **Mean Ethanol ± SD** | **pH** | **Mean pH ± SD** | **Sucrose**  **(°Brix)** | **Mean Sucrose ± SD** | **Sugar Peak**  **Height** | **Sugar Peak Height ± SD** | **Total Dissolved Solids**  **(ppm)** | **Total Dissolved Solids ± SD** |
| --- | --- | --- | --- | --- | --- | --- | --- | --- | --- | --- | --- | --- |
| **Tambak** | **0** | **A** | 0.02 | 0.02 ± 0 | 5.85 | 5.85 ± 0.03 | 17.7 | 17.70 ± 0 | 581054 | 578078 ± 3042 | 2217 | 2120 ± 126 |
| **B** | 0.01 | 5.83 | 17.7 | 578205 | 2166 |
| **C** | 0.02 | 5.88 | 17.7 | 574974 | 1978 |
| **1** | **A** | 0.36 | 0.37 ± 0.03 | 4.39 | 4.34 ± 0.06 | 17 | 17.00 ± 0 | 492591 | 498928 ± 5524 | 2658 | 2511 ± 140 |
| **B** | 0.40 | 4.35 | 17 | 502727 | 2379 |
| **C** | 0.35 | 4.28 | 17 | 501465 | 2496 |
| **2** | **A** | 3.62 | 3.61 ± 0.23 | 4.16 | 4.08 ± 0.09 | 13.3 | 13.33 ± 0.15 | 380148 | 367375 ± 26307 | 3310 | 3079 ± 403 |
| **B** | 3.37 | 3.99 | 13.5 | 384856 | 3313 |
| **C** | 3.83 | 4.1 | 13.2 | 337120 | 2614 |
| **3** | **A** | 6.90 | 6.74 ± 0.20 | 4.14 | 4.06 ± 0.14 | 10 | 9.80 ± 0.62 | 182407 | 185308 ± 2513 | 3340 | 3424 ± 146 |
| **B** | 6.51 | 4.13 | 10.3 | 186759 | 3340 |
| **C** | 6.80 | 3.9 | 9.1 | 186759 | 3593 |
| **4** | **A** | 7.21 | 7.01 ± 0.26 | 4.01 | 3.98 ± 0.03 | 8.9 | 9.00 ± 0.10 | 196821 | 198949 ± 5254 | 3518 | 3556 ± 39 |
| **B** | 6.72 | 3.99 | 9.1 | 204933 | 3556 |
| **C** | 7.11 | 3.95 | 9 | 195092 | 3595 |
| **5** | **A** | 6.05 | 6.11 ± 0.19 | 3.88 | 3.83 ± 0.04 | 9 | 8.77 ± 0.32 | 196715 | 191084 ± 7930 | 3674 | 3688 ± 62 |
| **B** | 6.32 | 3.81 | 8.4 | 182015 | 3634 |
| **C** | 5.95 | 3.8 | 8.9 | 194521 | 3756 |
| **6** | **A** | 3.50 | 4.48 ± 0.85 | 3.84 | 3.81 ± 0.03 | 9.7 | 9.20 ± 0.46 | 208268 | 190237 ± 15683 | 3556 | 3622 ± 61 |
| **B** | 5.07 | 3.82 | 9.1 | 179766 | 3676 |
| **C** | 4.86 | 3.78 | 8.8 | 182678 | 3635 |
| **7** | **A** | 3.30 | 3.66 ± 0.32 | 3.81 | 3.79 ± 0.03 | 9.1 | 9.10 ± 0.10 | 208654 | 199254 ± 11024 | 3711 | 3700 ± 62 |
| **B** | 3.73 | 3.8 | 9 | 201989 | 3756 |
| **C** | 3.93 | 3.76 | 9.2 | 187120 | 3634 |
| **8** | **A** | 1.72 | 2.48 ± 0.72 | 3.63 | 3.63 ± 0.02 | 9.1 | 9.23 ± 0.42 | 196028 | 183621 ± 11203 | 3714 | 3786 ± 66 |
| **B** | 3.15 | 3.65 | 8.9 | 180589 | 3842 |
| **C** | 2.57 | 3.62 | 9.7 | 174246 | 3803 |
| **9** | **A** | 1.00 | 1.30 ± 0.79 | 3.62 | 3.60 ± 0.02 | 9.4 | 9.20 ± 0.20 | 189463 | 185589 ± 3963 | 3671 | 3739 ± 62 |
| **B** | 2.19 | 3.6 | 9 | 181542 | 3752 |
| **C** | 0.70 | 3.59 | 9.2 | 185762 | 3793 |
| **10** | **A** | 1.52 | 0.80 ± 0.64 | 3.7 | 3.68 ± 0.03 | 9.3 | 9.20 ± 0.10 | 245292 | 244660 ± 7566 | 3788 | 3790 ± 3 |
| **B** | 0.27 | 3.69 | 9.2 | 251891 | 3793 |
| **C** | 0.62 | 3.65 | 9.1 | 236798 | 3788 |

**Table** *Continued*

| **Sampling Location** | **Day** | **Replicate** | **Ethanol**  **(%v/v)** | **Mean Ethanol ± SD** | **pH** | **Mean pH ± SD** | **Sucrose**  **(°Brix)** | **Mean Sucrose ± SD** | **Sugar Peak**  **Height** | **Sugar Peak Height ± SD** | **Total Dissolved Solids**  **(ppm)** | **Total Dissolved Solids ± SD** |
| --- | --- | --- | --- | --- | --- | --- | --- | --- | --- | --- | --- | --- |
| **Tambak** | **11** | **A** | 0.18 | 0.22 ± 0.15 | 3.6 | 3.57 ± 0.03 | 9.1 | 9.43 ± 0.58 | 188612 | 198679 ± 22914 | 3996 | 3908 ± 0 |
| **B** | 0.10 | 3.56 | 10.1 | 224904 | 3788 |
| **C** | 0.38 | 3.55 | 9.1 | 182522 | 4005 |
| **12** | **A** | 0.11 | 0.14 ± 0.02 | 3.53 | 3.51 ± 0.02 | 9.8 | 9.83 ± 0.25 | 260948 | 255383 ± 30805 | 3714 | 3916 ± 0 |
| **B** | 0.16 | 3.51 | 9.6 | 207041 | 3445 |
| **C** | 0.13 | 3.5 | 10.1 | 208160 | 3756 |
| **13** | **A** | 0.09 | 0.08 ± 0.01 | 3.59 | 3.55 ± 0.04 | 8.9 | 8.70 ± 0.35 | 202974 | 200065 ± 2890 | 3634 | 3873 ± 0 |
| **B** | 0.08 | 3.55 | 8.9 | 200027 | 3842 |
| **C** | 0.07 | 3.52 | 8.3 | 197195 | 3714 |
| **14** | **A** | 0.07 | 0.08 ± 0.03 | 3.62 | 3.59 ± 0.03 | 9.1 | 9.27 ± 0.47 | 194409 | 199036 ± 11829 | 3880 | 3916 ± 0 |
| **B** | 0.07 | 3.59 | 9.8 | 212479 | 3830 |
| **C** | 0.09 | 3.57 | 8.9 | 190220 | 3873 |
| **15** | **A** | 0.10 | 0.07 ± 0.03 | 3.69 | 3.64 ±  0.05 | 8.5 | 8.80 ± 0.26 | 191305 | 198486 ± 6449 | 3923 | 3941 ± 89 |
| **B** | 0.07 | 3.6 | 8.9 | 200371 | 3632 |
| **C** | 0.06 | 3.64 | 9 | 203782 | 3880 |
| **16** | **A** | 0.08 | 0.07 ± 0.03 | 3.6 | 3.58 ±  0.02 | 9 | 8.67 ± 0.42 | 200093 | 199204 ± 1257 | 3880 | 3819 ± 53 |
| **B** | 0.10 | 3.58 | 8.2 | 198315 | 3880 |
| **C** | 0.04 | 3.56 | 8.8 | 199542 | 3880 |
| **17** | **A** | 0.07 | 0.06 ± 0.01 | 3.67 | 3.64 ±  0.04 | 8.4 | 8.63 ± 0.25 | 188986 | 191486 ± 4463 | 3916 | 3781 ± 231 |
| **B** | 0.05 | 3.6 | 8.6 | 188833 | 4052 |
| **C** | 0.06 | 3.65 | 8.9 | 196638 | 4025 |
| **18** | **A** | 0.05 | 0.05 ± 0 | 3.68 | 3.65 ±  0.03 | 8.9 | 8.80 ± 0.10 | 199069 | 194715 ± 3873 | 4062 | 3937 ± 25 |
| **B** | 0.05 | 3.64 | 8.8 | 193426 | 3916 |
| **C** | 0.06 | 3.63 | 8.7 | 191651 | 4110 |
| **19** | **A** | 0.03 | 0.05 ± 0.01 | 3.65 | 3.65 ±  0.01 | 9 | 8.60 ± 0.40 | 196699 | 190819 ± 5143 | 4062 | 3990 ± 60 |
| **B** | 0.05 | 3.64 | 8.6 | 188597 | 4062 |
| **C** | 0.03 | 3.66 | 8.2 | 187160 | 4062 |
| **20** | **A** | 0.06 | 0.03 ± 0.01 | 3.69 | 3.69 ±  0.02 | 9 | 8.60 ± 0.46 | 168112 | 211574 ± 38342 | 3196 | 4063 ± 42 |
| **B** | 0.04 | 3.7 | 8.1 | 240609 | 4015 |
| **C** | 0.05 | 3.67 | 8.7 | 226002 | 4087 |

**Table** *Continued*

| **Sampling Location** | **Day** | **Replicate** | **Ethanol**  **(%v/v)** | **Mean Ethanol ± SD** | **pH** | **Mean pH ± SD** | **Sucrose**  **(°Brix)** | **Mean Sucrose ± SD** | **Sugar Peak**  **Height** | **Sugar Peak Height ± SD** | **Total Dissolved Solids**  **(ppm)** | **Total Dissolved Solids ± SD** |
| --- | --- | --- | --- | --- | --- | --- | --- | --- | --- | --- | --- | --- |
| **Tambak** | **21** | **A** | 0.03 | 0.03 ± 0.01 | 3.66 | 3.65 ± 0.02 | 8.8 | 8.53 ± 0.46 | 178969 | 219482 ± 67587 | 4246 | 4014 ± 202 |
| **B** | 0.02 | 3.65 | 8 | 181971 | 3916 |
| **C** | 0.04 | 3.63 | 8.8 | 297506 | 3880 |
| **22** | **A** | 0.05 | 0.05 ± 0.01 | 3.66 | 3.63 ± 0.03 | 9.2 | 8.90 ± 0.26 | 242834 | 231838 ± 38528 | 4015 | 3955 ± 68 |
| **B** | 0.06 | 3.62 | 8.8 | 263673 | 3969 |
| **C** | 0.05 | 3.61 | 8.7 | 189008 | 3880 |
| **23** | **A** | 0.03 | 0.05 ± 0.02 | 3.72 | 3.72 ± 0.02 | 8.5 | 8.90 ± 0.36 | 232597 | 221929 ± 18472 | 3931 | 3972 ± 42 |
| **B** | 0.05 | 3.74 | 9.2 | 200600 | 4015 |
| **C** | 0.07 | 3.7 | 9 | 232591 | 3969 |
| **24** | **A** | 0.04 | 0.03 ± 0.01 | 3.71 | 3.72 ± 0.03 | 9.2 | 8.70 ± 0.62 | 257072 | 217854 ± 55463 | 4015 | 4095 ± 73 |
| **B** | 0.03 | 3.75 | 8 | 178636 | 4110 |
| **C** | 0.03 | 3.7 | 8.9 | 220772 | 4159 |
| **25** | **A** | 0.03 | 0.03 ± 0 | 3.89 | 3.87 ±  0.02 | 8.1 | 8.47 ± 0.40 | 178975 | 189374 ± 9649 | 4231 | 4147 ± 73 |
| **B** | 0.03 | 3.87 | 8.9 | 198037 | 4099 |
| **C** | 0.03 | 3.85 | 8.4 | 191109 | 4110 |
| **26** | **A** | 0.03 | 0.02 ± 0.01 | 3.89 | 3.85 ±  0.05 | 8.9 | 8.90 ± 0.10 | 135493 | 151677 ± 50479 | 3842 | 3882 ±41 |
| **B** | 0.01 | 3.86 | 8.8 | 111274 | 3880 |
| **C** | 0.03 | 3.8 | 9 | 208263 | 3923 |
| **27** | **A** | 0.03 | 0.03 ± 0.02 | 3.85 | 3.82 ±  0.03 | 8.8 | 8.50 ± 0.61 | 219674 | 198683 ± 22929 | 3939 | 4003 ± 73 |
| **B** | 0.05 | 3.79 | 8.9 | 202160 | 3986 |
| **C** | 0.01 | 3.83 | 7.8 | 174214 | 4083 |
| **28** | **A** | 0.01 | 0.02 ± 0.01 | 3.9 | 3.89 ±  0.02 | 7.6 | 7.73 ± 0.12 | 169333 | 172812 ± 3359 | 3969 | 4096 ± 110 |
| **B** | 0.03 | 3.89 | 7.8 | 176037 | 4159 |
| **C** | 0.02 | 3.87 | 7.8 | 173067 | 4159 |
| **29** | **A** | 0.02 | 0.30 ± 0.50 | 3.83 | 3.83 ±  0.02 | 7.8 | 7.80 ± 0.30 | 177108 | 181725 ± 5314 | 3931 | 3978 ± 47 |
| **B** | 0.00 | 3.85 | 7.5 | 180532 | 3977 |
| **C** | 0.87 | 3.81 | 8.1 | 187534 | 4025 |
| **30** | **A** | 0.00 | 0.00 ± 0 | 3.9 | 3.86 ±  0.04 | 7.4 | 7.80 ± 0.40 | 170968 | 178090 ± 6904 | 4297 | 4102 ± 169 |
| **B** | 0.00 | 3.86 | 8.2 | 178548 | 4005 |
| **C** | 0.00 | 3.83 | 7.8 | 184753 | 4005 |

**Table** *Continued*

| **Sampling Location** | **Day** | **Replicate** | **Ethanol**  **(%v/v)** | **Mean Ethanol ± SD** | **pH** | **Mean pH ± SD** | **Sucrose**  **(°Brix)** | **Mean Sucrose ± SD** | **Sugar Peak**  **Height** | **Sugar Peak Height ± SD** | **Total Dissolved Solids**  **(ppm)** | **Total Dissolved Solids ± SD** |
| --- | --- | --- | --- | --- | --- | --- | --- | --- | --- | --- | --- | --- |
| **Tambak** | **31** | **A** | 0.00 | 0.00 ± 0 | 3.88 | 3.85 ± 0.04 | 8 | 7.77 ± 0.32 | 238663 | 240981 ± 30721 | 4087 | 4048 ± 36 |
| **B** | 0.00 | 3.86 | 7.9 | 211484 | 4041 |
| **C** | 0.00 | 3.8 | 7.4 | 272795 | 4015 |
| **32** | **A** | 0.00 | 0.00 ± 0 | 3.87 | 3.82 ± 0.04 | 8 | 7.97 ± 0.15 | 226326 | 208587 ± 44383 | 4099 | 4099 ± 0 |
| **B** | 0.00 | 3.81 | 8.1 | 241358 | 4099 |
| **C** | 0.00 | 3.79 | 7.8 | 158078 | 4099 |
| **33** | **A** | 0.00 | 0.14 ± 0.24 | 3.8 | 3.83 ± 0.03 | 7 | 7.10 ± 0.26 | 248674 | 188418 ± 59038 | 4025 | 4053 ± 25 |
| **B** | 0.00 | 3.83 | 6.9 | 185903 | 4062 |
| **C** | 0.42 | 3.85 | 7.4 | 130678 | 4072 |
| **34** | **A** | 0.00 | 0.08 ± 0.14 | 3.79 | 3.77 ± 0.02 | 6.8 | 7.03 ± 0.32 | 161192 | 156899 ± 14278 | 4297 | 4148 ± 143 |
| **B** | 0.00 | 3.75 | 7.4 | 168537 | 4134 |
| **C** | 0.24 | 3.78 | 6.9 | 140967 | 4012 |
| **35** | **A** | 0.98 | 0.41 ± 0.51 | 3.79 | 3.73 ± 0.05 | 6.7 | 6.73 ± 0.25 | 135851 | 171032 ± 48807 | 4172 | 4167 ± 32 |
| **B** | 0.24 | 3.69 | 7 | 150493 | 4133 |
| **C** | 0.00 | 3.72 | 6.5 | 226752 | 4196 |
| **36** | **A** | 0.00 | 0.12 ± 0.21 | 3.7 | 3.70 ± 0.02 | 7.4 | 7.20 ± 0.26 | 172340 | 168902 ± 3026 | 4172 | 4183 ± 12 |
| **B** | 0.36 | 3.69 | 6.9 | 166645 | 4182 |
| **C** | 0.00 | 3.72 | 7.3 | 167721 | 4196 |
| **37** | **A** | 0.00 | 0.00 ± 0 | 3.9 | 3.86 ± 0.04 | 7 | 7.20 ± 0.35 | 188610 | 209145 ± 17810 | 4196 | 4196 ± 0 |
| **B** | 0.00 | 3.85 | 7 | 220380 | 4196 |
| **C** | 0.00 | 3.83 | 7.6 | 218446 | 4196 |
| **38** | **A** | 0.00 | 0.00 ± 0 | 3.95 | 3.91 ± 0.03 | 7.8 | 7.40 ± 0.36 | 226436 | 212353 ± 16001 | 4185 | 4200 ± 27 |
| **B** | 0.00 | 3.9 | 7.3 | 215670 | 4185 |
| **C** | 0.00 | 3.89 | 7.1 | 194954 | 4231 |
| **39** | **A** | 0.00 | 0.00 ± 0 | 3.79 | 3.75 ± 0.03 | 7.1 | 7.43 ± 0.35 | 145300 | 162142 ± 21370 | 4223 | 4224 ± 52 |
| **B** | 0.00 | 3.74 | 7.8 | 186181 | 4276 |
| **C** | 0.00 | 3.73 | 7.4 | 154944 | 4172 |
| **40** | **A** | 0.00 | 0.00 ± 0 | 3.86 | 3.84 ± 0.02 | 7.6 | 7.37 ± 0.25 | 159026 | 172255 ± 11583 | 4223 | 4228 ± 5 |
| **B** | 0.00 | 3.84 | 7.4 | 180575 | 4231 |
| **C** | 0.00 | 3.83 | 7.1 | 177165 | 4231 |

**Table** *Continued*

| **Sampling Location** | **Day** | **Replicate** | **Ethanol**  **(%v/v)** | **Mean Ethanol ± SD** | **pH** | **Mean pH ± SD** | **Sucrose**  **(°Brix)** | **Mean Sucrose ± SD** | **Sugar Peak**  **Height** | **Sugar Peak Height ± SD** | **Total Dissolved Solids**  **(ppm)** | **Total Dissolved Solids ± SD** |
| --- | --- | --- | --- | --- | --- | --- | --- | --- | --- | --- | --- | --- |
| **Tambak** | **41** | **A** | 0.00 | 0.00 ± 0 | 3.75 | 3.77 ± 0.02 | 7.8 | 7.57 ± 0.21 | 170496 | 175894 ± 20979 | 4134 | 4134 ± 0 |
| **B** | 0.00 | 3.79 | 7.5 | 199044 | 4134 |
| **C** | 0.00 | 3.78 | 7.4 | 158141 | 4134 |
| **42** | **A** | 1.05 | 0.47 ± 0.53 | 3.54 | 3.58 ± 0.03 | 6.4 | 7.10 ± 0.61 | 122496 | 137328 ± 15882 | 4185 | 4185 ± 0 |
| **B** | 0.00 | 3.59 | 7.4 | 154084 | 4185 |
| **C** | 0.36 | 3.6 | 7.5 | 135403 | 4185 |
| **43** | **A** | 1.23 | 0.41 ± 0.71 | 3.98 | 3.91 ± 0.06 | 6.4 | 6.83 ± 0.51 | 133880 | 150856 ± 14821 | 4196 | 4196 ± 0 |
| **B** | 0.00 | 3.86 | 6.7 | 157466 | 4196 |
| **C** | 0.00 | 3.88 | 7.4 | 161221 | 4196 |
| **44** | **A** | 0.00 | 0.04 ± 0.07 | 4.08 | 4.09 ± 0.02 | 7 | 7.03 ± 0.15 | 162661 | 158563 ± 17596 | 4223 | 4205 ± 16 |
| **B** | 0.12 | 4.11 | 6.9 | 173748 | 4196 |
| **C** | 0.00 | 4.09 | 7.2 | 139280 | 4196 |
| **45** | **A** | 0.00 | 0.15 ± 0.26 | 3.73 | 3.77 ± 0.04 | 6.6 | 6.83 ± 0.21 | 111654 | 141567 ± 37200 | 4122 | 4139 ± 77 |
| **B** | 0.00 | 3.78 | 6.9 | 183221 | 4072 |
| **C** | 0.45 | 3.8 | 7 | 129827 | 4223 |
| **46** | **A** | 0.00 | 0.00 ± 0 | 3.69 | 3.70 ± 0.02 | 6.5 | 6.73 ± 0.21 | 117299 | 142783 ± 23439 | 4223 | 4223 ± 0 |
| **B** | 0.00 | 3.72 | 6.9 | 163420 | 4223 |
| **C** | 0.00 | 3.68 | 6.8 | 147630 | 4223 |
| **47** | **A** | 0.00 | 0.02 ± 0.03 | 3.83 | 3.76 ± 0.06 | 7.2 | 6.87 ± 0.35 | 141595 | 169374 ± 32705 | 4025 | 4098 ± 63 |
| **B** | 0.05 | 3.75 | 6.9 | 205419 | 4134 |
| **C** | 0.00 | 3.71 | 6.5 | 161108 | 4134 |
| **48** | **A** | 0.00 | 0.00 ± 0 | 3.69 | 3.69 ± 0.01 | 7 | 6.50 ± 0.50 | 143144 | 148345 ± 4558 | 4159 | 4139 ± 69 |
| **B** | 0.00 | 3.68 | 6 | 151647 | 4062 |
| **C** | 0.00 | 3.7 | 6.5 | 150243 | 4196 |
| **49** | **A** | 0.00 | 0.00 ± 0 | 4.11 | 4.10 ± 0.06 | 6.9 | 6.67 ± 0.25 | 111689 | 138397 ± 23489 | 4261 | 4181 ± 72 |
| **B** | 0.00 | 4.03 | 6.7 | 147657 | 4159 |
| **C** | 0.00 | 4.15 | 6.4 | 155844 | 4122 |
| **50** | **A** | 0.00 | 0.00 ± 0 | 4.38 | 4.35 ± 0.04 | 6.3 | 6.53 ± 0.25 | 150098 | 154298 ± 7426 | 4209 | 4209 ± 0 |
| **B** | 0.00 | 4.36 | 6.5 | 149923 | 4209 |
| **C** | 0.00 | 4.3 | 6.8 | 162872 | 4209 |

**Table** *Continued*

| **Sampling Location** | **Day** | **Replicate** | **Ethanol**  **(%v/v)** | **Mean Ethanol ± SD** | **pH** | **Mean pH ± SD** | **Sucrose**  **(°Brix)** | **Mean Sucrose ± SD** | **Sugar Peak**  **Height** | **Sugar Peak Height ± SD** | **Total Dissolved Solids**  **(ppm)** | **Total Dissolved Solids ± SD** |
| --- | --- | --- | --- | --- | --- | --- | --- | --- | --- | --- | --- | --- |
| **Tambak** | **51** | **A** | 0.00 | 0.00 ± 0 | 3.95 | 3.93 ± 0.02 | 6.8 | 6.63 ± 0.15 | 176925 | 129369 ± 58848 | 4231 | 4231 ± 0 |
| **B** | 0.00 | 3.92 | 6.5 | 147627 | 4231 |
| **C** | 0.00 | 3.93 | 6.6 | 63556 | 4231 |
| **52** | **A** | 0.99 | 0.33 ± 0.57 | 4.14 | 4.10 ± 0.03 | 6.4 | 6.50 ± 0.10 | 104986 | 114110 ± 9231 | 4223 | 4223 ± 0 |
| **B** | 0.00 | 4.08 | 6.6 | 113900 | 4223 |
| **C** | 0.00 | 4.09 | 6.5 | 123444 | 4223 |
| **53** | **A** | 0.17 | 0.08 ± 0.09 | 3.92 | 3.92 ± 0.03 | 6.2 | 6.37 ± 0.15 | 96883 | 94632 ± 3225 | 4246 | 4246 ± 0.00 |
| **B** | 0.06 | 3.89 | 6.4 | 96076 | 4246 |
| **C** | 0.00 | 3.94 | 6.5 | 90938 | 4246 |
| **54** | **A** | 0.00 | 0.00 ± 0 | 4.2 | 4.22 ± 0.03 | 6.5 | 6.40 ± 0.10 | 132171 | 105177 ± 41653 | 4225 | 4232 ± 12 |
| **B** | 0.00 | 4.22 | 6.4 | 57206 | 4246 |
| **C** | 0.00 | 4.25 | 6.3 | 126153 | 4225 |
| **55** | **A** | 0.00 | 0.00 ± 0 | 3.9 | 3.93 ± 0.03 | 6 | 6.17 ± 0.15 | 97191 | 114088 ± 23770 | 4261 | 4261 ± 0 |
| **B** | 0.00 | 3.95 | 6.2 | 103806 | 4261 |
| **C** | 0.00 | 3.93 | 6.3 | 141268 | 4261 |
| **56** | **A** | 0.00 | 0.00 ± 0 | 4.18 | 4.21 ± 0.03 | 6.6 | 6.10 ± 0.62 | 123718 | 88046 ± 31683 | 4276 | 4276 ± 0 |
| **B** | 0.00 | 4.24 | 5.4 | 63178 | 4276 |
| **C** | 0.00 | 4.2 | 6.3 | 77242 | 4276 |
| **57** | **A** | 0.00 | 0.00 ± 0 | 4.2 | 4.23 ± 0.03 | 5.6 | 5.57 ± 0.15 | 75693 | 95566 ± 17805 | 4238 | 4277 ± 34 |
| **B** | 0.00 | 4.25 | 5.4 | 100941 | 4297 |
| **C** | 0.00 | 4.23 | 5.7 | 110065 | 4297 |
| **58** | **A** | 0.00 | 0.00 ± 0 | 3.8 | 3.85 ± 0.05 | 5.4 | 5.93 ± 0.50 | 120541 | 105378 ± 15052 | 4313 | 4308 ± 9 |
| **B** | 0.00 | 3.84 | 6.4 | 90440 | 4313 |
| **C** | 0.00 | 3.9 | 6 | 105154 | 4297 |
| **59** | **A** | 0.00 | 0.00 ± 0 | 4.14 | 4.19 ± 0.05 | 5.4 | 5.73 ± 0.31 | 95047 | 87284 ± 7099 | 4276 | 4307 ± 28 |
| **B** | 0.00 | 4.19 | 5.8 | 85681 | 4329 |
| **C** | 0.00 | 4.24 | 6 | 81123 | 4316 |
| **60** | **A** | 0.00 | 0.00 ± 0 | 4.24 | 4.21 ± 0.03 | 4.9 | 5.33 ± 0.40 | 78479 | 83646 ± 19812 | 4316 | 4316 ± 0 |
| **B** | 0.00 | 4.2 | 5.4 | 105530 | 4316 |
| **C** | 0.00 | 4.19 | 5.7 | 66929 | 4316 |

**Table** *Continued*

| **Sampling**  **Location** | **Day** | **Replicate** | **Ethanol**  **(%v/v)** | **Mean Ethanol ± SD** | **pH** | **Mean pH ± SD** | **Sucrose**  **(°Brix)** | **Mean Sucrose ± SD** | **Sugar Peak**  **Height** | **Sugar Peak Height ± SD** | **Total Dissolved Solids**  **(ppm)** | **Total Dissolved Solids ± SD** |
| --- | --- | --- | --- | --- | --- | --- | --- | --- | --- | --- | --- | --- |
| **Kabong** | **0** | **A** | 0.04 | 0.05 ± 0 | 6.4 | 6.38 ± 0.02 | 19.5 | 19.50 ± 0 | 612002 | 615903 ± 4031 | 2151 | 2084 ± 126 |
| **B** | 0.05 | 6.38 | 19.5 | 615654 | 2135 |
| **C** | 0.05 | 6.36 | 19.5 | 620053 | 1965 |
| **1** | **A** | 0.35 | 0.37 ± 0.02 | 4.4 | 4.42 ± 0.03 | 19 | 18.90 ± 0.10 | 555990 | 561004 ± 4469 | 2456 | 2204 ± 223 |
| **B** | 0.40 | 4.42 | 18.8 | 564565 | 2033 |
| **C** | 0.37 | 4.45 | 18.9 | 562458 | 2123 |
| **2** | **A** | 2.03 | 2.22 ± 0.20 | 4.33 | 4.28 ± 0.06 | 17.1 | 17.10 ± 0.10 | 531617 | 503662 ± 45820 | 2456 | 2459 ± 5 |
| **B** | 2.21 | 4.29 | 17 | 450783 | 2464 |
| **C** | 2.43 | 4.21 | 17.2 | 528587 | 2456 |
| **3** | **A** | 5.66 | 5.87 ± 0.28 | 4.39 | 4.37 ± 0.02 | 13 | 12.63 ± 0.40 | 385523 | 369643 ± 17532 | 3007 | 3059 ± 225 |
| **B** | 5.75 | 4.36 | 12.7 | 372576 | 3306 |
| **C** | 6.19 | 4.35 | 12.2 | 350829 | 2865 |
| **4** | **A** | 8.45 | 8.70 ± 0.23 | 4.33 | 4.29 ± 0.03 | 10.6 | 10.43 ± 0.15 | 236097 | 225411 ± 9272 | 3343 | 3439 ± 169 |
| **B** | 8.89 | 4.28 | 10.4 | 220644 | 3634 |
| **C** | 8.76 | 4.27 | 10.3 | 219492 | 3340 |
| **5** | **A** | 9.21 | 10.01 ± 0.73 | 4.21 | 4.19 ± 0.02 | 10 | 9.97 ± 0.06 | 198425 | 201029 ± 10814 | 3555 | 3580 ± 22 |
| **B** | 10.64 | 4.19 | 9.9 | 191755 | 3593 |
| **C** | 10.18 | 4.18 | 10 | 212908 | 3593 |
| **6** | **A** | 9.33 | 9.59 ± 0.80 | 4.15 | 4.13 ± 0.03 | 9.9 | 9.67 ± 0.21 | 178088 | 179051 ± 3398 | 3620 | 3620 ± 0 |
| **B** | 8.95 | 4.1 | 9.6 | 176239 | 3620 |
| **C** | 10.49 | 4.14 | 9.5 | 182827 | 3620 |
| **7** | **A** | 6.83 | 8.55 ± 2.03 | 4.11 | 4.09 ± 0.02 | 9.5 | 9.53 ± 0.06 | 219363 | 207347 ± 10423 | 3671 | 3671 ± 0 |
| **B** | 10.78 | 4.08 | 9.6 | 200749 | 3671 |
| **C** | 8.03 | 4.07 | 9.5 | 201928 | 3671 |
| **8** | **A** | 6.96 | 7.12 ± 0.20 | 4.01 | 4.00 ± 0.01 | 9.3 | 9.47 ± 0.15 | 178961 | 175572 ± 3034 | 3711 | 3711 ± 0 |
| **B** | 7.34 | 3.99 | 9.5 | 174645 | 3711 |
| **C** | 7.06 | 3.99 | 9.6 | 173109 | 3711 |
| **9** | **A** | 5.63 | 6.09 ± 0.49 | 3.94 | 3.95 ± 0.02 | 9.9 | 9.37 ± 0.50 | 201999 | 181351 ± 18525 | 3671 | 3714 ± 43 |
| **B** | 6.61 | 3.97 | 8.9 | 166188 | 3756 |
| **C** | 6.03 | 3.93 | 9.3 | 175867 | 3714 |
| **10** | **A** | 4.00 | 6.40 ± 2.43 | 3.91 | 3.91 ± 0.01 | 9.4 | 9.10 ± 0.36 | 175363 | 170661 ± 4305 | 3752 | 3752 ± 0 |
| **B** | 8.85 | 3.92 | 9.2 | 169709 | 3752 |
| **C** | 6.36 | 3.9 | 8.7 | 166912 | 3752 |

**Table** *Continued*

| **Sampling Location** | **Day** | **Replicate** | **Ethanol**  **(%v/v)** | **Mean Ethanol ± SD** | **pH** | **Mean pH ± SD** | **Sucrose**  **(°Brix)** | **Mean Sucrose ± SD** | **Sugar Peak**  **Height** | **Sugar Peak Height ± SD** | **Total Dissolved Solids**  **(ppm)** | **Total Dissolved Solids ± SD** |
| --- | --- | --- | --- | --- | --- | --- | --- | --- | --- | --- | --- | --- |
| **Kabong** | **11** | **A** | 5.40 | 5.36 ± 0.91 | 3.96 | 3.95 ± 0.01 | 9.2 | 9.00 ± 0.20 | 141899 | 148093 ± 5666 | 3788 | 3788 ± 0 |
| **B** | 6.25 | 3.95 | 9 | 149366 | 3788 |
| **C** | 4.43 | 3.94 | 8.8 | 153015 | 3788 |
| **12** | **A** | 1.64 | 3.84 ± 2.08 | 3.92 | 3.93 ± 0.01 | 9.4 | 9.23 ± 0.21 | 192547 | 162181 ± 26335 | 3793 | 3793 ± 0 |
| **B** | 5.78 | 3.94 | 9.3 | 145602 | 3793 |
| **C** | 4.10 | 3.93 | 9 | 148394 | 3793 |
| **13** | **A** | 5.75 | 4.27 ± 1.91 | 3.89 | 3.89 ± 0.01 | 9.3 | 9.13 ± 0.15 | 137172 | 143875 ± 6332 | 3824 | 3824 ± 0 |
| **B** | 2.11 | 3.9 | 9.1 | 149756 | 3824 |
| **C** | 4.94 | 3.89 | 9 | 144698 | 3824 |
| **14** | **A** | 3.51 | 3.24 ± 0.36 | 3.85 | 3.83 ± 0.02 | 9 | 9.00 ± 0 | 143624 | 145326 ± 7004 | 3842 | 3842 ± 0 |
| **B** | 2.83 | 3.83 | 9 | 153024 | 3842 |
| **C** | 3.39 | 3.82 | 9 | 139330 | 3842 |
| **15** | **A** | 2.43 | 2.90 ± 2.14 | 3.79 | 3.77 ± 0.02 | 9.2 | 9.27 ± 0.06 | 146451 | 149556 ± 3083 | 3847 | 3847 ± 0 |
| **B** | 1.04 | 3.78 | 9.3 | 152617 | 3847 |
| **C** | 5.24 | 3.75 | 9.3 | 149601 | 3847 |
| **16** | **A** | 2.19 | 3.36 ± 1.26 | 3.75 | 3.74 ± 0.01 | 9.1 | 9.17 ± 0.06 | 150481 | 149593 ± 2259 | 3880 | 3880 ± 0 |
| **B** | 4.70 | 3.73 | 9.2 | 151273 | 3880 |
| **C** | 3.18 | 3.74 | 9.2 | 147025 | 3880 |
| **17** | **A** | 1.72 | 0.62 ± 0.95 | 3.75 | 3.74 ± 0.01 | 9 | 9.10 ± 0.10 | 155052 | 170655 ± 13788 | 3969 | 3910 ± 51 |
| **B** | 0.15 | 3.73 | 9.1 | 175714 | 3880 |
| **C** | 0.00 | 3.74 | 9.2 | 181198 | 3880 |
| **18** | **A** | 0.66 | 0.46 ± 0.40 | 3.73 | 3.71 ± 0.02 | 9.2 | 9.13 ± 0.06 | 173038 | 178697 ± 12824 | 3923 | 3926 ± 5 |
| **B** | 0.00 | 3.7 | 9.1 | 193377 | 3931 |
| **C** | 0.73 | 3.71 | 9.1 | 169676 | 3923 |
| **19** | **A** | 0.00 | 0.00 ± 0 | 3.7 | 3.72 ± 0.02 | 9.4 | 9.23 ± 0.15 | 189768 | 183965 ± 22000 | 3952 | 3937 ± 25 |
| **B** | 0.00 | 3.72 | 9.2 | 202481 | 3908 |
| **C** | 9.16 | 3.74 | 9.1 | 159645 | 3952 |
| **20** | **A** | 0.00 | 0.50 ± 0.86 | 3.74 | 3.80 ± 0.14 | 9.1 | 9.07 ± 0.06 | 196202 | 191079 ± 13008 | 3931 | 3931 ± 0 |
| **B** | 0.00 | 3.96 | 9 | 200745 | 3931 |
| **C** | 1.49 | 3.7 | 9.1 | 176289 | 3931 |

**Table** *Continued*

| **Sampling Location** | **Day** | **Replicate** | **Ethanol**  **(%v/v)** | **Mean Ethanol ± SD** | **pH** | **Mean pH ± SD** | **Sucrose**  **(°Brix)** | **Mean Sucrose ± SD** | **Sugar Peak**  **Height** | **Sugar Peak Height ± SD** | **Total Dissolved Solids**  **(ppm)** | **Total Dissolved Solids ± SD** |
| --- | --- | --- | --- | --- | --- | --- | --- | --- | --- | --- | --- | --- |
| **Kabong** | **21** | **A** | 3.23 | 0.99 ± 0.47 | 3.75 | 3.76 ± 0.02 | 9.2 | 9.17 ± 0.15 | 165739 | 226285 ± 95091 | 3969 | 3969 ± 0 |
| **B** | 0.00 | 3.78 | 9 | 335886 | 3969 |
| **C** | 1.97 | 3.76 | 9.3 | 177231 | 3969 |
| **22** | **A** | 0.00 | 0.01 ± 0.03 | 3.69 | 3.67 ± 0.02 | 8.9 | 8.97 ± 0.06 | 189024 | 224717 ± 54547 | 4005 | 3981 ± 21 |
| **B** | 0.04 | 3.68 | 9 | 287507 | 3969 |
| **C** | 0.00 | 3.65 | 9 | 197621 | 3969 |
| **23** | **A** | 0.00 | 0.35 ± 0.38 | 3.7 | 3.69 ± 0.02 | 9.1 | 9.10 ± 0 | 288902 | 206271 ± 71846 | 3989 | 4002 ± 42 |
| **B** | 0.26 | 3.71 | 9.1 | 158565 | 4049 |
| **C** | 0.79 | 3.67 | 9.1 | 171345 | 3969 |
| **24** | **A** | 0.00 | 0.05 ± 0.11 | 3.56 | 3.57 ± 0.03 | 9.2 | 9.17 ± 0.06 | 277051 | 236176 ± 38974 | 3969 | 3969 ± 0 |
| **B** | 0.00 | 3.6 | 9.1 | 199433 | 3969 |
| **C** | 0.16 | 3.54 | 9.2 | 232043 | 3969 |
| **25** | **A** | 0.00 | 0.00 ± 0 | 3.46 | 3.47 ± 0.01 | 9.4 | 9.20 ± 0.20 | 205557 | 211040 ± 9213 | 3928 | 3979 ± 44 |
| **B** | 0.00 | 3.48 | 9.2 | 221677 | 4005 |
| **C** | 0.00 | 3.47 | 9 | 205886 | 4005 |
| **26** | **A** | 2.02 | 2.13 ± 0.91 | 3.4 | 3.39 ± 0.01 | 9 | 9.03 ± 0.06 | 158226 | 177764 ± 19693 | 4005 | 4005 ± 0 |
| **B** | 1.54 | 3.39 | 9.1 | 197609 | 4005 |
| **C** | 2.83 | 3.38 | 9 | 177456 | 4005 |
| **27** | **A** | 0.00 | 0.13 ± 0.28 | 3.48 | 3.51 ± 0.04 | 9.2 | 9.20 ± 0.10 | 254104 | 193737 ± 54379 | 4063 | 4015 ± 66 |
| **B** | 0.00 | 3.5 | 9.3 | 178521 | 3940 |
| **C** | 0.40 | 3.55 | 9.1 | 148587 | 4041 |
| **28** | **A** | 0.00 | 0.17 ± 0.32 | 3.69 | 3.67 ± 0.03 | 8.9 | 8.93 ± 0.06 | 151497 | 156815 ± 6257 | 4015 | 4015 ± 0 |
| **B** | 0.03 | 3.68 | 8.9 | 163709 | 4015 |
| **C** | 0.48 | 3.64 | 9 | 155240 | 4015 |
| **29** | **A** | 0.41 | 0.37 ± 0.50 | 3.7 | 3.70 ± 0.01 | 9.3 | 9.10 ± 0.17 | 154099 | 178064 ± 39596 | 4015 | 4024 ± 15 |
| **B** | 0.71 | 3.69 | 9 | 156325 | 4015 |
| **C** | 0.00 | 3.71 | 9 | 223768 | 4041 |
| **30** | **A** | 0.06 | 0.02 ± 0 | 3.68 | 3.67 ± 0.01 | 9.2 | 9.10 ± 0.10 | 167040 | 211053 ± 38200 | 4041 | 4032 ± 15 |
| **B** | 0.00 | 3.67 | 9 | 235582 | 4041 |
| **C** | 0.00 | 3.66 | 9.1 | 230537 | 4015 |

**Table** *Continued*

| **Sampling Location** | **Day** | **Replicate** | **Ethanol**  **(%v/v)** | **Mean Ethanol ± SD** | **pH** | **Mean pH ± SD** | **Sucrose**  **(°Brix)** | **Mean Sucrose ± SD** | **Sugar Peak**  **Height** | **Sugar Peak Height ± SD** | **Total Dissolved Solids**  **(ppm)** | **Total Dissolved Solids ± SD** |
| --- | --- | --- | --- | --- | --- | --- | --- | --- | --- | --- | --- | --- |
| **Kabong** | **31** | **A** | 0.44 | 0.35 ± 0.43 | 3.58 | 3.58 ± 0.02 | 9 | 9.00 ± 0.10 | 154199 | 157740 ± 15110 | 4041 | 4041 ± 0 |
| **B** | 0.00 | 3.6 | 9.1 | 174306 | 4041 |
| **C** | 0.61 | 3.57 | 8.9 | 144716 | 4041 |
| **32** | **A** | 0.00 | 0.00 ± 0 | 3.58 | 3.51 ± 0.06 | 9.3 | 9.10 ± 0.17 | 200005 | 188113 ± 10398 | 4015 | 4040 ± 24 |
| **B** | 0.00 | 3.48 | 9 | 180733 | 4041 |
| **C** | 0.00 | 3.46 | 9 | 183602 | 4063 |
| **33** | **A** | 0.00 | 0.00 ± 0 | 3.35 | 3.33 ± 0.02 | 9.2 | 9.03 ± 0.15 | 163597 | 191948 ± 30660 | 4063 | 4063 ± 0 |
| **B** | 0.00 | 3.33 | 9 | 224487 | 4063 |
| **C** | 0.00 | 3.32 | 8.9 | 187761 | 4063 |
| **34** | **A** | 0.00 | 0.07 ± 0.15 | 3.4 | 3.41 ± 0.01 | 8.9 | 8.93 ± 0.06 | 161050 | 159966 ± 1534 | 4063 | 4079 ± 14 |
| **B** | 0.19 | 3.41 | 8.9 | 158881 | 4087 |
| **C** | 0.00 | 3.42 | 9 | 163520 | 4087 |
| **35** | **A** | 0.00 | 0.07 ± 0.15 | 3.3 | 3.33 ± 0.03 | 8.9 | 8.90 ± 0 | 154413 | 161582 ± 6256 | 4087 | 4087 ± 0 |
| **B** | 0.00 | 3.35 | 8.9 | 165930 | 4087 |
| **C** | 0.22 | 3.33 | 8.9 | 164404 | 4087 |
| **36** | **A** | 0.00 | 0.16 ± 0.35 | 3.58 | 3.50 ± 0.07 | 8.9 | 8.83 ± 0.06 | 159733 | 162136 ± 2302 | 4083 | 4086 ± 2 |
| **B** | 0.00 | 3.48 | 8.8 | 162355 | 4087 |
| **C** | 0.49 | 3.45 | 8.8 | 164321 | 4087 |
| **37** | **A** | 0.37 | 0.13 ± 0.01 | 3.6 | 3.59 ± 0.04 | 8.7 | 8.70 ± 0 | 161390 | 164725 ± 5619 | 4072 | 4106 ± 47 |
| **B** | 0.01 | 3.55 | 8.7 | 161572 | 4087 |
| **C** | 0.00 | 3.63 | 8.7 | 171212 | 4159 |
| **38** | **A** | 0.02 | 0.06 ± 0.11 | 3.59 | 3.64 ± 0.05 | 8.7 | 8.67 ± 0.06 | 168637 | 171907 ± 2919 | 4133 | 4126 ± 6 |
| **B** | 0.00 | 3.63 | 8.7 | 174251 | 4122 |
| **C** | 0.15 | 3.69 | 8.6 | 172833 | 4122 |
| **39** | **A** | 0.00 | 0.00 ± 0 | 3.76 | 3.72 ± 0.03 | 8.6 | 8.57 ± 0.06 | 161584 | 164807 ± 3438 | 4133 | 4133 ± 0 |
| **B** | 0.00 | 3.71 | 8.6 | 168502 | 4133 |
| **C** | 0.00 | 3.7 | 8.5 | 164334 | 4133 |
| **40** | **A** | 0.01 | 0.05 ± 0.10 | 3.78 | 3.80 ± 0.02 | 8.5 | 8.47 ± 0.06 | 185301 | 174429 ± 9420 | 4172 | 4142 ± 51 |
| **B** | 0.14 | 3.8 | 8.5 | 169307 | 4172 |
| **C** | 0.01 | 3.82 | 8.4 | 168680 | 4083 |

**Table** *Continued*

| **Sampling Location** | **Day** | **Replicate** | **Ethanol**  **(%v/v)** | **Mean Ethanol ± SD** | **pH** | **Mean pH ± SD** | **Sucrose**  **(°Brix)** | **Mean Sucrose ± SD** | **Sugar Peak**  **Height** | **Sugar Peak Height ± SD** | **Total Dissolved Solids**  **(ppm)** | **Total Dissolved Solids ± SD** |
| --- | --- | --- | --- | --- | --- | --- | --- | --- | --- | --- | --- | --- |
| **Kabong** | **41** | **A** | 0.01 | 0.04 ± 0.06 | 3.79 | 3.79 ± 0.04 | 8.5 | 8.43 ± 0.06 | 161382 | 158633 ± 2879 | 4025 | 4082 ± 49 |
| **B** | 0.01 | 3.83 | 8.4 | 155639 | 4110 |
| **C** | 0.09 | 3.75 | 8.4 | 158879 | 4110 |
| **42** | **A** | 0.01 | 0.07 ± 0.12 | 3.73 | 3.75 ± 0.02 | 8.3 | 8.33 ± 0.06 | 167425 | 190105 ± 35845 | 4134 | 4134 ± 0 |
| **B** | 0.01 | 3.75 | 8.4 | 231429 | 4134 |
| **C** | 0.18 | 3.76 | 8.3 | 171460 | 4134 |
| **43** | **A** | 0.46 | 0.16 ± 0 | 3.79 | 3.83 ± 0.05 | 8.5 | 8.33 ± 0.15 | 179610 | 169552 ± 8712 | 4172 | 4147 ± 22 |
| **B** | 0.01 | 3.89 | 8.3 | 164688 | 4134 |
| **C** | 0.01 | 3.82 | 8.2 | 164358 | 4134 |
| **44** | **A** | 0.01 | 0.01 ± 0 | 3.83 | 3.84 ± 0.01 | 8.4 | 8.35 ± 0.07 | 160889 | 167409 ± 17476 | 4172 | 4172 ± 0 |
| **B** | 0.01 | 3.84 | 8.3 | 187207 | 4172 |
| **C** | 0.01 | 3.85 | 8.2. | 154130 | 4172 |
| **45** | **A** | 0.01 | 0.03 ± 0.04 | 3.82 | 3.85 ± 0.03 | 8.3 | 8.30 ± 0.10 | 168697 | 172007 ± 20861 | 4185 | 4185 ± 0 |
| **B** | 0.01 | 3.85 | 8.2 | 152999 | 4185 |
| **C** | 0.07 | 3.87 | 8.4 | 194325 | 4185 |
| **46** | **A** | 0.31 | 0.46 ± 0.75 | 3.7 | 3.73 ± 0.03 | 8.4 | 8.50 ± 0.10 | 164329 | 157108 ± 7736 | 4159 | 4176 ± 15 |
| **B** | 0.01 | 3.76 | 8.5 | 148943 | 4185 |
| **C** | 1.08 | 3.73 | 8.6 | 158052 | 4185 |
| **47** | **A** | 0.00 | 0.08 ± 0.11 | 3.71 | 3.73 ± 0.02 | 8.1 | 8.10 ± 0.10 | 169478 | 160304 ± 13044 | 4200 | 4178 ± 26 |
| **B** | 0.20 | 3.75 | 8.2 | 166063 | 4150 |
| **C** | 0.04 | 3.74 | 8 | 145372 | 4185 |
| **48** | **A** | 1.04 | 0.45 ± 0.22 | 3.75 | 3.75 ± 0.01 | 8.1 | 8.23 ± 0.12 | 141835 | 156179 ± 12791 | 4129 | 4176 ± 41 |
| **B** | 0.32 | 3.74 | 8.3 | 160305 | 4200 |
| **C** | 0.00 | 3.76 | 8.3 | 166398 | 4200 |
| **49** | **A** | 0.00 | 0.00 ± 0 | 3.8 | 3.78 ± 0.02 | 8.2 | 8.10 ± 0.10 | 151577 | 164302 ± 13545 | 4159 | 4197 ± 36 |
| **B** | 0.00 | 3.78 | 8.1 | 162947 | 4231 |
| **C** | 0.00 | 3.76 | 8 | 178382 | 4200 |
| **50** | **A** | 0.19 | 0.09 ± 0.06 | 3.8 | 3.80 ± 0.01 | 8.2 | 8.03 ± 0.15 | 163625 | 162276 ± 2575 | 4200 | 4200 ± 0 |
| **B** | 0.00 | 3.79 | 8 | 163897 | 4200 |
| **C** | 0.08 | 3.81 | 7.9 | 159307 | 4200 |

**Table** *Continued*

| **Sampling Location** | **Day** | **Replicate** | **Ethanol**  **(%v/v)** | **Mean Ethanol ± SD** | **pH** | **Mean pH ± SD** | **Sucrose**  **(°Brix)** | **Mean Sucrose ± SD** | **Sugar Peak**  **Height** | **Sugar Peak Height ± SD** | **Total Dissolved Solids**  **(ppm)** | **Total Dissolved Solids ± SD** |
| --- | --- | --- | --- | --- | --- | --- | --- | --- | --- | --- | --- | --- |
| **Kabong** | **51** | **A** | 0.01 | 0.05 ± 0.09 | 3.68 | 3.68 ± 0.02 | 7.9 | 7.93 ± 0.06 | 163310 | 160403 ± 4112 | 4209 | 4209 ± 0 |
| **B** | 0.13 | 3.7 | 7.9 | 157495 | 4209 |
| **C** | 0.00 | 3.67 | 8 | 160523 | 4209 |
| **52** | **A** | 0.00 | 0.00 ± 0 | 3.6 | 3.65 ± 0.05 | 7.9 | 7.90 ± 0.10 | 161541 | 157493 ± 5725 | 4231 | 4216 ± 13 |
| **B** | 0.00 | 3.65 | 7.8 | 153444 | 4209 |
| **C** | 0.00 | 3.69 | 8 | 157951 | 4209 |
| **53** | **A** | 0.00 | 0.00 ± 0 | 4.09 | 3.99 ± 0.10 | 7.5 | 7.73 ± 0.21 | 164678 | 168261 ± 7212 | 4231 | 4226 ± 9 |
| **B** | 0.00 | 3.98 | 7.9 | 163542 | 4215 |
| **C** | 0.00 | 3.9 | 7.8 | 176562 | 4231 |
| **54** | **A** | 0.00 | 0.00 ± 0 | 3.92 | 3.75 ± 0.30 | 7.7 | 7.77 ± 0.06 | 165269 | 161262 ± 5667 | 4223 | 4223 ± 0 |
| **B** | 0.00 | 3.93 | 7.8 | 163087 | 4223 |
| **C** | 0.00 | 3.4 | 7.8 | 157255 | 4223 |
| **55** | **A** | 0.00 | 0.00 ± 0 | 3.94 | 3.91 ± 0.06 | 7.7 | 7.70 ± 0.10 | 170868 | 162058 ± 9918 | 4209 | 4224 ± 13 |
| **B** | 0.00 | 3.95 | 7.6 | 151317 | 4231 |
| **C** | 0.00 | 3.85 | 7.8 | 163990 | 4231 |
| **56** | **A** | 0.00 | 0.00 ± 0 | 4.08 | 4.07 ± 0.01 | 7.6 | 7.57 ± 0.06 | 190765 | 182871 ± 7090 | 4231 | 4231 ± 0 |
| **B** | 0.00 | 4.07 | 7.5 | 180801 | 4231 |
| **C** | 0.00 | 4.06 | 7.6 | 177046 | 4231 |
| **57** | **A** | 0.00 | 0.00 ± 0 | 3.93 | 3.94 ± 0.02 | 7.2 | 7.50 ± 0.26 | 165627 | 154896 ± 9294 | 4246 | 4246 ± 0 |
| **B** | 0.00 | 3.94 | 7.6 | 149612 | 4246 |
| **C** | 0.00 | 3.96 | 7.7 | 149449 | 4246 |
| **58** | **A** | 0.00 | 0.00 ± 0 | 3.91 | 3.91 ± 0.02 | 7.6 | 7.57 ± 0.06 | 174842 | 173890 ± 3026 | 4251 | 4249 ± 3 |
| **B** | 0.00 | 3.92 | 7.5 | 176326 | 4246 |
| **C** | 0.00 | 3.89 | 7.6 | 170502 | 4251 |
| **59** | **A** | 0.00 | 0.00 ± 0 | 3.95 | 3.87 ± 0.07 | 7 | 7.30 ± 0.26 | 172727 | 172660 ± 6168 | 4268 | 4273 ± 5 |
| **B** | 0.00 | 3.84 | 7.5 | 178794 | 4276 |
| **C** | 0.00 | 3.83 | 7.4 | 166458 | 4276 |
| **60** | **A** | 0.00 | 0.00 ± 0 | 3.63 | 3.63 ± 0.02 | 7.4 | 7.43 ± 0.06 | 166755 | 167920 ± 2867 | 4258 | 4269 ± 10 |
| **B** | 0.00 | 3.65 | 7.4 | 171186 | 4273 |
| **C** | 0.00 | 3.62 | 7.5 | 165818 | 4276 |

**Table** *Continued*

| **Sampling**  **Location** | **Day** | **Replicate** | **Ethanol**  **(%v/v)** | **Mean Ethanol ± SD** | **pH** | **Mean pH ± SD** | **Sucrose**  **(°Brix)** | **Mean Sucrose ± SD** | **Sugar Peak**  **Height** | **Sugar Peak Height ± SD** | **Total Dissolved Solids**  **(ppm)** | **Total Dissolved Solids ± SD** |
| --- | --- | --- | --- | --- | --- | --- | --- | --- | --- | --- | --- | --- |
| **Maludam** | **0** | **A** | 0.03 | 0.02 ± 0.01 | 5.83 | 5.91 ± 0.07 | 17.8 | 17.67 ± 0.15 | 562422 | 570556 ± 10992 | 2033 | 1951 ± 72 |
| **B** | 0.02 | 5.96 | 17.7 | 566184 | 1896 |
| **C** | 0.02 | 5.93 | 17.5 | 583061 | 1924 |
| **1** | **A** | 0.54 | 0.42 ± 0.11 | 4.51 | 4.66 ± 0.15 | 16.3 | 16.67 ± 0.47 | 479439 | 480058 ± 1077 | 2565 | 2456 ± 170 |
| **B** | 0.35 | 4.67 | 17.2 | 481301 | 2260 |
| **C** | 0.37 | 4.8 | 16.5 | 479433 | 2543 |
| **2** | **A** | 0.97 | 1.03 ± 0.05 | 4.2 | 4.24 ± 0.05 | 16.3 | 16.27 ± 0.06 | 469708 | 475688 ± 8457 | 2782 | 2611 ± 225 |
| **B** | 1.08 | 4.29 | 16.2 | 481668 | 2356 |
| **C** | 1.05 | 4.23 | 16.3 | 522635 | 2694 |
| **3** | **A** | 3.07 | 3.14 ± 0.32 | 4.18 | 4.18 ± 0.01 | 13.2 | 13.47 ± 0.31 | 291565 | 341333 ± 45673 | 2835 | 2666 ± 219 |
| **B** | 3.49 | 4.19 | 13.4 | 351103 | 2743 |
| **C** | 2.87 | 4.17 | 13.8 | 381330 | 2419 |
| **4** | **A** | 4.73 | 3.15 ± 1.49 | 4.14 | 4.14 ± 0.01 | 11.1 | 12.27 ± 1.01 | 292661 | 387643 ± 83008 | 3013 | 3006 ± 39 |
| **B** | 2.93 | 4.15 | 12.8 | 423993 | 3042 |
| **C** | 1.78 | 4.13 | 12.9 | 446275 | 2964 |
| **5** | **A** | 6.15 | 4.54 ± 1.43 | 4.1 | 4.08 ± 0.02 | 11.5 | 11.43 ± 0.06 | 226230 | 295327 ± 60381 | 3110 | 3110 ± 0 |
| **B** | 4.07 | 4.08 | 11.4 | 321806 | 3110 |
| **C** | 3.42 | 4.07 | 11.4 | 337944 | 3110 |
| **6** | **A** | 4.16 | 4.58 ± 0.66 | 4.05 | 4.04 ± 0.01 | 10.9 | 11.03 ± 0.15 | 231301 | 236087 ± 60381 | 3170 | 3165 ± 9 |
| **B** | 4.22 | 4.04 | 11.2 | 272755 | 3170 |
| **C** | 5.34 | 4.03 | 11 | 204206 | 3154 |
| **7** | **A** | 1.92 | 2.06 ± 1.14 | 3.96 | 3.95 ± 0.01 | 10.9 | 10.77 ± 0.32 | 361436 | 317789 ± 34524 | 3175 | 3208 ± 57 |
| **B** | 3.27 | 3.95 | 10.4 | 247127 | 3273 |
| **C** | 0.99 | 3.94 | 11 | 344804 | 3175 |
| **8** | **A** | 2.58 | 2.91 ± 0.69 | 3.92 | 3.92 ± 0.03 | 10.7 | 10.07 ± 0.60 | 259359 | 236835 ± 61758 | 3690 | 3581 ± 95 |
| **B** | 3.70 | 3.94 | 9.5 | 201640 | 3536 |
| **C** | 2.45 | 3.89 | 10 | 249507 | 3518 |
| **9** | **A** | 0.12 | 1.28 ± 1.18 | 3.86 | 3.85 ± 0.01 | 10.5 | 10.00 ± 0.50 | 373232 | 292076 ± 70620 | 3550 | 3555 ± 4 |
| **B** | 2.48 | 3.85 | 10 | 258384 | 3558 |
| **C** | 1.24 | 3.84 | 9.5 | 244612 | 3556 |
| **10** | **A** | 1.56 | 1.13 ± 0.97 | 3.84 | 3.83 ± 0.01 | 9.8 | 9.77 ± 0.06 | 189974 | 240510 ± 75274 | 3560 | 3564 ± 5 |
| **B** | 0.02 | 3.83 | 9.7 | 327022 | 3562 |
| **C** | 1.81 | 3.82 | 9.8 | 204534 | 3570 |

**Table** *Continued*

| **Sampling Location** | **Day** | **Replicate** | **Ethanol**  **(%v/v)** | **Mean Ethanol ± SD** | **pH** | **Mean pH ± SD** | **Sucrose**  **(°Brix)** | **Mean Sucrose ± SD** | **Sugar Peak**  **Height** | **Sugar Peak Height ± SD** | **Total Dissolved Solids**  **(ppm)** | **Total Dissolved Solids ± SD** |
| --- | --- | --- | --- | --- | --- | --- | --- | --- | --- | --- | --- | --- |
| **Maludam** | **11** | **A** | 0.01 | 0.16 ± 0.21 | 3.84 | 3.83 ± 0.01 | 10 | 9.93 ± 0.06 | 284970 | 248959 ± 32786 | 3575 | 3582 ± 8 |
| **B** | 0.06 | 3.83 | 9.9 | 241072 | 3580 |
| **C** | 0.40 | 3.82 | 9.9 | 220836 | 3590 |
| **12** | **A** | 0.12 | 0.08 ± 0.05 | 3.79 | 3.80 ± 0.01 | 9.9 | 9.90 ± 0 | 312753 | 281136 ± 27425 | 3600 | 3600 ± 0 |
| **B** | 0.02 | 3.8 | 9.9 | 263776 | 3600 |
| **C** | 0.10 | 3.81 | 9.9 | 266880 | 3600 |
| **13** | **A** | 0.04 | 0.18 ± 0.26 | 3.79 | 3.78 ± 0.01 | 9.9 | 9.83 ± 0.06 | 268856 | 293647 ± 23046 | 3650 | 3657 ± 16 |
| **B** | 0.48 | 3.78 | 9.8 | 314418 | 3645 |
| **C** | 0.02 | 3.77 | 9.8 | 297668 | 3675 |
| **14** | **A** | 0.11 | 0.30 ± 0.42 | 3.75 | 3.75 ± 0.02 | 10.1 | 9.87 ± 0.21 | 308048 | 261802 ± 49412 | 3700 | 3730 ± 26 |
| **B** | 0.01 | 3.76 | 9.7 | 267619 | 3750 |
| **C** | 0.79 | 3.73 | 9.8 | 209738 | 3740 |
| **15** | **A** | 0.01 | 0.02 ± 0.01 | 3.69 | 3.68 ± 0.01 | 9.6 | 9.63 ± 0.06 | 193697 | 256502 ± 69915 | 3749 | 3766 ± 21 |
| **B** | 0.02 | 3.68 | 9.6 | 331834 | 3760 |
| **C** | 0.02 | 3.67 | 9.7 | 243976 | 3789 |
| **16** | **A** | 0.19 | 0.20 ± 0.02 | 3.54 | 3.53 ± 0.01 | 9.5 | 9.43 ± 0.06 | 282240 | 235019 ± 58046 | 3838 | 3829 ± 9 |
| **B** | 0.20 | 3.52 | 9.4 | 170214 | 3828 |
| **C** | 0.22 | 3.53 | 9.4 | 252602 | 3820 |
| **17** | **A** | 0.17 | 0.32 ± 0.20 | 3.42 | 3.46 ± 0.03 | 9.3 | 9.27 ± 0.06 | 235228 | 207761 ± 44530 | 3840 | 3854 ± 14 |
| **B** | 0.24 | 3.47 | 9.2 | 156383 | 3856 |
| **C** | 0.54 | 3.48 | 9.3 | 231671 | 3867 |
| **18** | **A** | 0.22 | 0.19 ± 0.10 | 3.4 | 3.41 ± 0.07 | 9 | 9.03 ± 0.06 | 353652 | 256231 ± 87337 | 3870 | 3875 ± 5 |
| **B** | 0.08 | 3.49 | 9.1 | 184948 | 3875 |
| **C** | 0.26 | 3.35 | 9 | 230092 | 3880 |
| **19** | **A** | 0.00 | 0.06 ± 0.06 | 3.39 | 3.35 ± 0.05 | 8.9 | 9.00 ± 0.10 | 196146 | 239579 ± 38093 | 3890 | 3897 ± 8 |
| **B** | 0.08 | 3.36 | 9 | 255274 | 3895 |
| **C** | 0.09 | 3.3 | 9.1 | 267318 | 3905 |
| **20** | **A** | 0.86 | 0.39 ± 0.42 | 3.4 | 3.41 ± 0.01 | 9 | 8.90 ± 0.10 | 183405 | 232190 ± 48176 | 3908 | 3930 ± 20 |
| **B** | 0.03 | 3.41 | 8.9 | 279734 | 3948 |
| **C** | 0.28 | 3.42 | 8.8 | 233431 | 3935 |

**Table** *Continued*

| **Sampling Location** | **Day** | **Replicate** | **Ethanol**  **(%v/v)** | **Mean Ethanol ± SD** | **pH** | **Mean pH ± SD** | **Sucrose**  **(°Brix)** | **Mean Sucrose ± SD** | **Sugar Peak**  **Height** | **Sugar Peak Height ± SD** | **Total Dissolved Solids**  **(ppm)** | **Total Dissolved Solids ± SD** |
| --- | --- | --- | --- | --- | --- | --- | --- | --- | --- | --- | --- | --- |
| **Maludam** | **21** | **A** | 0.18 | 0.10 ± 0.02 | 3.45 | 3.45 ± 0.02 | 8.7 | 8.73 ± 0.06 | 156032 | 254809 ± 93442 | 3940 | 3954 ± 13 |
| **B** | 0.07 | 3.43 | 8.8 | 266596 | 3956 |
| **C** | 0.04 | 3.47 | 8.7 | 341798 | 3965 |
| **22** | **A** | 0.41 | 0.40 ± 0.46 | 3.49 | 3.50 ± 0.02 | 8.7 | 8.67 ± 0.06 | 265849 | 226180 ± 46085 | 3966 | 3966 ± 0 |
| **B** | 0.07 | 3.52 | 8.6 | 237064 | 3966 |
| **C** | 0.72 | 3.5 | 8.7 | 175628 | 3966 |
| **23** | **A** | 0.09 | 0.16 ± 0.21 | 3.61 | 3.59 ± 0.02 | 8.7 | 8.60 ± 0.10 | 197847 | 201771 ± 7836 | 3975 | 3982 ± 8 |
| **B** | 0.35 | 3.59 | 8.6 | 196673 | 3980 |
| **C** | 0.06 | 3.57 | 8.5 | 210794 | 3990 |
| **24** | **A** | 0.41 | 0.55 ± 0.57 | 3.62 | 3.63 ± 0.01 | 8.6 | 8.53 ± 0.06 | 169274 | 193336 ± 40359 | 3985 | 3985 ± 0 |
| **B** | 1.02 | 3.63 | 8.5 | 170804 | 3985 |
| **C** | 0.21 | 3.64 | 8.5 | 239931 | 3985 |
| **25** | **A** | 0.40 | 0.50 ± 0.76 | 3.68 | 3.66 ± 0.02 | 8.6 | 8.60 ± 0 | 164656 | 179572 ± 25807 | 3995 | 3995 ± 0 |
| **B** | 1.09 | 3.65 | 8.6 | 209372 | 3995 |
| **C** | 0.02 | 3.66 | 8.6 | 164689 | 3995 |
| **26** | **A** | 0.00 | 0.25 ± 0.44 | 3.72 | 3.71 ± 0.01 | 8.5 | 8.43 ± 0.06 | 158079 | 166866 ± 10226 | 4005 | 4003 ± 4 |
| **B** | 0.68 | 3.71 | 8.4 | 178091 | 3998 |
| **C** | 0.06 | 3.7 | 8.4 | 164427 | 4005 |
| **27** | **A** | 0.83 | 0.67 ± 0.34 | 3.74 | 3.74 ± 0.01 | 8.3 | 8.33 ± 0.15 | 165333 | 162400 ± 12127 | 4010 | 4044 ± 61 |
| **B** | 0.84 | 3.75 | 8.5 | 172792 | 4008 |
| **C** | 0.35 | 3.73 | 8.2 | 149076 | 4115 |
| **28** | **A** | 0.51 | 0.30 ± 0.01 | 3.8 | 3.79 ± 0.01 | 8.2 | 8.20 ± 0.10 | 134443 | 188589 ± 60329 | 4115 | 4114 ± 4 |
| **B** | 0.20 | 3.79 | 8.3 | 177705 | 4117 |
| **C** | 0.19 | 3.78 | 8.1 | 253619 | 4110 |
| **29** | **A** | 0.40 | 0.66 ± 0.22 | 3.79 | 3.80 ± 0.01 | 8 | 8.03 ± 0.06 | 145772 | 152120 ± 10039 | 4119 | 4121 ± 3 |
| **B** | 0.63 | 3.8 | 8.1 | 146894 | 4120 |
| **C** | 0.95 | 3.81 | 8 | 163694 | 4125 |
| **30** | **A** | 0.43 | 0.97 ± 0.01 | 3.8 | 3.81 ± 0.01 | 8 | 7.97 ± 0.06 | 157872 | 174082 ± 21654 | 4130 | 4135 ± 5 |
| **B** | 1.24 | 3.81 | 7.9 | 165701 | 4136 |
| **C** | 1.25 | 3.81 | 8 | 198674 | 4140 |

**Table** *Continued*

| **Sampling Location** | **Day** | **Replicate** | **Ethanol**  **(%v/v)** | **Mean Ethanol ± SD** | **pH** | **Mean pH ± SD** | **Sucrose**  **(°Brix)** | **Mean Sucrose ± SD** | **Sugar Peak**  **Height** | **Sugar Peak Height ± SD** | **Total Dissolved Solids**  **(ppm)** | **Total Dissolved Solids ± SD** |
| --- | --- | --- | --- | --- | --- | --- | --- | --- | --- | --- | --- | --- |
| **Maludam** | **31** | **A** | 0.29 | 0.47 ± 0.27 | 3.82 | 3.83 ± 0.02 | 8 | 8.00 ± 0 | 148096 | 142958 ± 8495 | 4140 | 4145 ± 5 |
| **B** | 0.36 | 3.85 | 8 | 133153 | 4145 |
| **C** | 0.75 | 3.83 | 8 | 147625 | 4150 |
| **32** | **A** | 0.61 | 0.51 ± 0.43 | 3.86 | 3.87 ± 0.02 | 7.9 | 7.87 ± 0.06 | 124883 | 122732 ± 32221 | 4153 | 4153 ± 1 |
| **B** | 0.77 | 3.89 | 7.9 | 153824 | 4154 |
| **C** | 0.16 | 3.87 | 7.8 | 89490 | 4153 |
| **33** | **A** | 0.43 | 0.40 ± 0.27 | 3.89 | 3.90 ± 0.01 | 7.8 | 7.80 ± 0 | 98215 | 112217 ± 12222 | 4159 | 4165 ± 7 |
| **B** | 0.57 | 3.9 | 7.8 | 120742 | 4162 |
| **C** | 0.20 | 3.91 | 7.8 | 117695 | 4173 |
| **34** | **A** | 0.54 | 0.37 ± 0.15 | 3.94 | 3.93 ± 0.01 | 7.7 | 7.67 ± 0.06 | 130673 | 130356 ± 449 | 4175 | 4178 ± 3 |
| **B** | 0.39 | 3.93 | 7.6 | 130038 | 4178 |
| **C** | 0.17 | 3.92 | 7.7 | 121890 | 4180 |
| **35** | **A** | 0.94 | 0.77 ± 0.01 | 3.96 | 3.95 ± 0.01 | 7.5 | 7.57 ± 0.06 | 82180 | 107187 ± 33167 | 4193 | 4191 ± 2 |
| **B** | 0.68 | 3.95 | 7.6 | 144811 | 4190 |
| **C** | 0.69 | 3.94 | 7.6 | 94569 | 4189 |
| **36** | **A** | 0.55 | 0.54 ± 0.12 | 3.98 | 3.94 ± 0.03 | 7.5 | 7.43 ± 0.06 | 103764 | 109315 ± 9521 | 4185 | 4173 ± 11 |
| **B** | 0.62 | 3.93 | 7.4 | 120308 | 4163 |
| **C** | 0.45 | 3.92 | 7.4 | 103872 | 4170 |
| **37** | **A** | 0.65 | 0.55 ± 0.07 | 3.95 | 3.96 ± 0.01 | 7.3 | 7.47 ± 0.15 | 171587 | 144780 ± 27136 | 4193 | 4193 ± 3 |
| **B** | 0.54 | 3.96 | 7.6 | 117327 | 4190 |
| **C** | 0.45 | 3.97 | 7.5 | 145427 | 4195 |
| **38** | **A** | 0.40 | 0.34 ± 0 | 3.17 | 3.71 ± 0.47 | 7.2 | 7.17 ± 0.06 | 87972 | 101012 ± 15611 | 4196 | 4198 ± 2 |
| **B** | 0.31 | 3.98 | 7.1 | 96754 | 4197 |
| **C** | 0.32 | 3.99 | 7.2 | 118310 | 4200 |
| **39** | **A** | 0.28 | 0.25 ± 0.06 | 4.04 | 4.05 ± 0.02 | 7.1 | 7.00 ± 0.10 | 129722 | 126642 ± 51310 | 4205 | 4206 ± 1 |
| **B** | 0.28 | 4.05 | 7 | 176343 | 4207 |
| **C** | 0.19 | 4.07 | 6.9 | 73861 | 4205 |
| **40** | **A** | 0.40 | 0.51 ± 0.19 | 4.08 | 4.09 ± 0.01 | 6.9 | 6.93 ± 0.06 | 131218 | 109029 ± 21735 | 4210 | 4212 ± 3 |
| **B** | 0.70 | 4.09 | 7 | 108090 | 4215 |
| **C** | 0.43 | 4.1 | 6.9 | 87778 | 4210 |

**Table** *Continued*

| **Sampling Location** | **Day** | **Replicate** | **Ethanol**  **(%v/v)** | **Mean Ethanol ± SD** | **pH** | **Mean pH ± SD** | **Sucrose**  **(°Brix)** | **Mean Sucrose ± SD** | **Sugar Peak**  **Height** | **Sugar Peak Height ± SD** | **Total Dissolved Solids**  **(ppm)** | **Total Dissolved Solids ± SD** |
| --- | --- | --- | --- | --- | --- | --- | --- | --- | --- | --- | --- | --- |
| **Maludam** | **41** | **A** | 0.46 | 0.31 ± 0.34 | 4.07 | 4.06 ± 0.04 | 6.9 | 6.87 ± 0.06 | 96568 | 79317 ± 16597 | 4220 | 4218 ± 3 |
| **B** | 0.00 | 4.02 | 6.8 | 63463 | 4215 |
| **C** | 0.48 | 4.1 | 6.9 | 77919 | 4220 |
| **42** | **A** | 0.35 | 0.33 ± 0.16 | 4.13 | 4.14 ± 0.02 | 6.8 | 6.77 ± 0.06 | 73326 | 75244 ± 11141 | 4205 | 4201 ± 4 |
| **B** | 0.21 | 4.14 | 6.8 | 65187 | 4200 |
| **C** | 0.43 | 4.16 | 6.7 | 87220 | 4197 |
| **43** | **A** | 0.47 | 0.70 ± 0.03 | 4.2 | 4.19 ± 0.01 | 6.7 | 6.67 ± 0.06 | 71110 | 109977 ± 45184 | 4225 | 4224 ± 1 |
| **B** | 0.80 | 4.18 | 6.6 | 99266 | 4223 |
| **C** | 0.83 | 4.19 | 6.7 | 159554 | 4225 |
| **44** | **A** | 0.00 | 0.17 ± 0.05 | 4.22 | 4.23 ± 0.01 | 6.6 | 6.57 ± 0.06 | 43164 | 89559 ± 41613 | 4228 | 4233 ± 4 |
| **B** | 0.21 | 4.23 | 6.5 | 101928 | 4235 |
| **C** | 0.29 | 4.24 | 6.6 | 123585 | 4236 |
| **45** | **A** | 0.28 | 0.29 ± 0.07 | 4.3 | 4.31 ± 0.02 | 6.4 | 6.47 ± 0.06 | 104903 | 99381 ± 4969 | 4205 | 4208 ± 3 |
| **B** | 0.35 | 4.31 | 6.5 | 97967 | 4208 |
| **C** | 0.25 | 4.33 | 6.5 | 95272 | 4210 |
| **46** | **A** | 0.00 | 0.06 ± 0.03 | 4.4 | 4.44 ± 0.03 | 6.4 | 6.37 ± 0.06 | 48060 | 68793 ± 23509 | 4238 | 4241 ± 4 |
| **B** | 0.07 | 4.45 | 6.4 | 63983 | 4240 |
| **C** | 0.11 | 4.46 | 6.3 | 94335 | 4245 |
| **47** | **A** | 0.36 | 0.20 ± 0.17 | 4.2 | 4.22 ± 0.03 | 6.4 | 6.40 ± 0 | 95974 | 69522 ± 28988 | 4248 | 4250 ± 2 |
| **B** | 0.25 | 4.21 | 6.4 | 74059 | 4250 |
| **C** | 0.00 | 4.25 | 6.4 | 38533 | 4251 |
| **48** | **A** | 0.39 | 0.50 ± 0.37 | 4.25 | 4.28 ± 0.03 | 6.3 | 6.33 ± 0.06 | 67065 | 104783 ± 32917 | 4255 | 4254 ± 4 |
| **B** | 0.30 | 4.28 | 6.4 | 119569 | 4250 |
| **C** | 0.82 | 4.3 | 6.3 | 127714 | 4258 |
| **49** | **A** | 0.23 | 0.18 ± 0.21 | 4.18 | 4.17 ± 0.01 | 6.3 | 6.23 ± 0.06 | 55961 | 64151 ± 10536 | 4258 | 4258 ± 3 |
| **B** | 0.29 | 4.16 | 6.2 | 76037 | 4255 |
| **C** | 0.00 | 4.17 | 6.2 | 60454 | 4260 |
| **50** | **A** | 0.14 | 0.12 ± 0.15 | 4.2 | 4.20 ± 0.02 | 6.1 | 6.13 ± 0.06 | 64050 | 54285 ± 8680 | 4259 | 4263 ± 4 |
| **B** | 0.00 | 4.21 | 6.2 | 47448 | 4262 |
| **C** | 0.22 | 4.18 | 6.1 | 51357 | 4267 |

**Table** *Continued*

| **Sampling Location** | **Day** | **Replicate** | **Ethanol**  **(%v/v)** | **Mean Ethanol ± SD** | **pH** | **Mean pH ± SD** | **Sucrose**  **(°Brix)** | **Mean Sucrose ± SD** | **Sugar Peak**  **Height** | **Sugar Peak Height ± SD** | **Total Dissolved Solids**  **(ppm)** | **Total Dissolved Solids ± SD** |
| --- | --- | --- | --- | --- | --- | --- | --- | --- | --- | --- | --- | --- |
| **Maludam** | **51** | **A** | 0.51 | 0.28 ± 0.23 | 4.15 | 4.15 ± 0.04 | 5.9 | 5.93 ± 0.06 | 90768 | 80570 ± 14422 | 4260 | 4260 ± 0 |
| **B** | 0.33 | 4.18 | 6 | 70372 | 4260 |
| **C** | 0.00 | 4.11 | 5.9 | 28676 | 4260 |
| **52** | **A** | 0.00 | 0.17 ± 0.15 | 4.1 | 4.09 ± 0.01 | 5.9 | 5.90 ± 0 | 43010 | 82679 ± 56234 | 4263 | 4264 ± 1 |
| **B** | 0.15 | 4.09 | 5.9 | 57994 | 4264 |
| **C** | 0.36 | 4.08 | 5.9 | 147033 | 4265 |
| **53** | **A** | 0.00 | 0.15 ± 0.31 | 4.08 | 4.10 ± 0.02 | 5.8 | 5.83 ± 0.06 | 54857 | 62542 ± 31955 | 4266 | 4266 ± 1 |
| **B** | 0.44 | 4.11 | 5.9 | 97639 | 4267 |
| **C** | 0.00 | 4.12 | 5.8 | 35130 | 4265 |
| **54** | **A** | 0.05 | 0.10 ± 0.04 | 4.14 | 4.14 ± 0.01 | 5.8 | 5.77 ± 0.06 | 130717 | 84255 ± 45007 | 4269 | 4270 ± 1 |
| **B** | 0.10 | 4.13 | 5.7 | 40859 | 4270 |
| **C** | 0.16 | 4.15 | 5.8 | 81188 | 4270 |
| **55** | **A** | 0.00 | 0.00 ± 0 | 3.93 | 3.94 ± 0.02 | 5.8 | 5.80 ± 0 | 29302 | 51680 ± 25964 | 4272 | 4273 ± 2 |
| **B** | 0.00 | 3.94 | 5.8 | 45591 | 4273 |
| **C** | 0.00 | 3.96 | 5.8 | 80148 | 4275 |
| **56** | **A** | 0.35 | 0.50 ± 0.06 | 3.95 | 3.94 ± 0.02 | 5.7 | 5.73 ± 0.06 | 59710 | 96155 ± 39094 | 4275 | 4275 ± 0 |
| **B** | 0.61 | 3.96 | 5.7 | 91308 | 4275 |
| **C** | 0.52 | 3.92 | 5.8 | 137446 | 4275 |
| **57** | **A** | 0.25 | 0.37 ± 0.06 | 3.97 | 3.94 ± 0.03 | 5.7 | 5.67 ± 0.06 | 55285 | 80172 ± 24487 | 4277 | 4278 ± 2 |
| **B** | 0.47 | 3.94 | 5.7 | 104238 | 4278 |
| **C** | 0.38 | 3.92 | 5.6 | 80992 | 4280 |
| **58** | **A** | 0.00 | 0.02 ± 0.04 | 3.9 | 3.89 ± 0.01 | 5.7 | 5.63 ± 0.06 | 23995 | 27336 ± 3463 | 4280 | 4282 ± 2 |
| **B** | 0.00 | 3.89 | 5.6 | 27103 | 4283 |
| **C** | 0.06 | 3.88 | 5.6 | 30909 | 4284 |
| **59** | **A** | 0.00 | 0.00 ± 0 | 3.85 | 3.83 ± 0.02 | 5.6 | 5.60 ± 0 | 63974 | 62062 ± 18399 | 4285 | 4286 ± 1 |
| **B** | 0.00 | 3.83 | 5.6 | 42781 | 4286 |
| **C** | 0.00 | 3.82 | 5.6 | 79430 | 4287 |
| **60** | **A** | 0.09 | 0.03 ± 0 | 3.81 | 3.80 ± 0.01 | 5.5 | 5.57 ± 0.06 | 74562 | 45666 ± 26437 | 4289 | 4290 ± 1 |
| **B** | 0.00 | 3.8 | 5.6 | 39743 | 4290 |
| **C** | 0.00 | 3.79 | 5.6 | 22692 | 4290 |


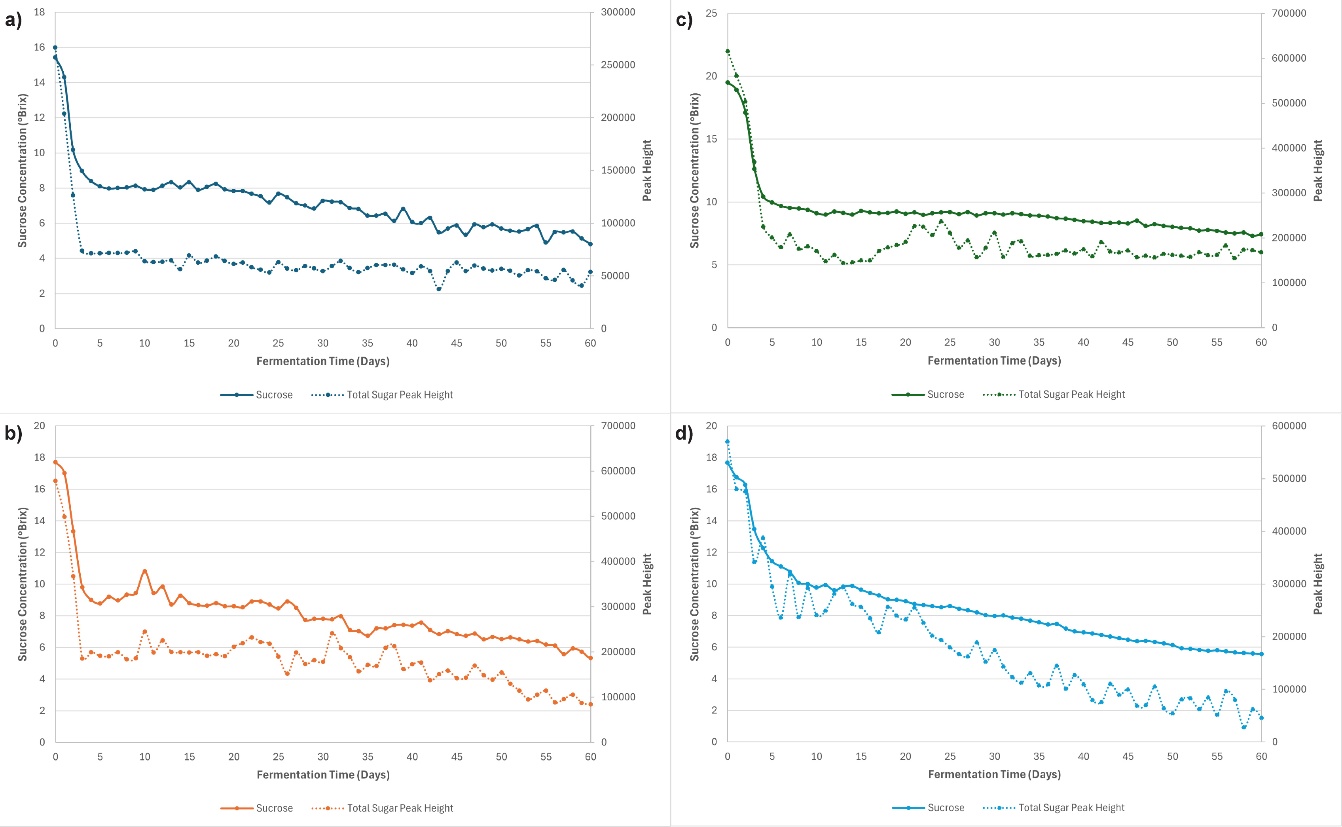


**Fig. S1** Sucrose (°Brix) and peak intensities of HPLC on total sugars during 60 days of nipa palm sap fermentation by sampling locations, **(a)** Tambirat, **(b)** Tambak, **(c)** Kabong, and **(d)** Maludam. All values are presented as mean ± SD (n=3).

**Table S2** Univariate Tests to Determine Normality between Sucrose (°Brix) and peak intensities of HPLC on total sugars.

| **Univariate Tests** | | | | |
| --- | --- | --- | --- | --- |
|  | Variable | Test | Statistic | P Value |
| 1 | Sugar Peak | Shapiro-Wilk | .827 | <0.001 |
| 3 | Sugar Peak | Lilliefors (KS) | .124 | <0.001 |
| 2 | °Brix | Shapiro-Wilk | .795 | <0.001 |
| 4 | °Brix | Lilliefors (KS) | .177 | <0.001 |
| Tests computed by R MVN package, version 6.2 | | | | |

**Table S3** Pearson Correlation Analysis between Sucrose (°Brix) and peak intensities of HPLC on total sugars.

| **Correlations** | | | |
| --- | --- | --- | --- |
|  | | Sugar Peak | °Brix |
| Sugar Peak | Pearson Correlation | 1 | **.895**** |
| Sig. (2-tailed) |  | **<.001** |
| N | 244 | 244 |
| °Brix | Pearson Correlation | **.895**** | 1 |
| Sig. (2-tailed) | **<.001** |  |
| N | 244 | 244 |
| **. Correlation is significant at the 0.01 level (2-tailed). | | | |


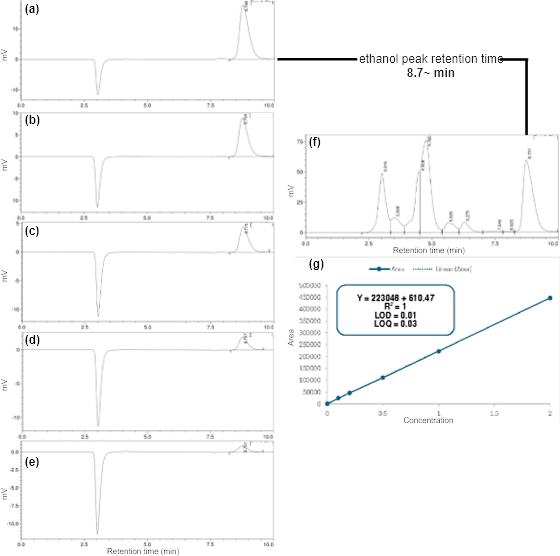


**Fig. S2** Chromatographic analysis and calibration curve of ethanol. Chromatogram of ethanol standard solution in five concentrations: (**a**) 2%, (**b**) 1%, (**c**) 0.5%, (**d**) 0.2%, and (**e**) 0.1%. (**f**) Identification of ethanol in the sample chromatogram by the retention time of the ethanol peak from the standard solution. (**g**) calibration curve equation obtained from ethanol standard solution with R2 = 1.

**Table S4** Calibration Curves Equations Obtained for Low Alcohol Range (0.1% - 2.0%).

| **No** | **Slope** | **Y-Intercept** | **R2** | **Lowest Concentration Peak Area (0.1%)** | **Calculated Lowest Calculation (0.1%)** | **LOD**  **(% v/v)** | **LOQ**  **(% v/v)** |
| --- | --- | --- | --- | --- | --- | --- | --- |
| 1 | 223048 | 610.47 | 1.0000 | 23819 | 0.104 | 0.01 | 0.03 |
| 2 | 216449 | 4850.7 | 0.9988 | 23951 | 0.088 | 0.07 | 0.22 |
| 3 | 224586 | 2288.1 | 0.9988 | 23819 | 0.096 | 0.03 | 0.10 |
| 4 | 209172 | 3372.7 | 0.9997 | 24365 | 0.100 | 0.05 | 0.16 |
| 5 | 215399 | 2135.6 | 0.9990 | 23971 | 0.101 | 0.03 | 0.10 |
| 6 | 217643 | 2516.1 | 0.9997 | 23865 | 0.098 | 0.03 | 0.12 |
| 7 | 208217 | 2662.0 | 0.9996 | 22839 | 0.097 | 0.04 | 0.13 |
| 8 | 215112 | 1869.2 | 0.9997 | 22388 | 0.095 | 0.03 | 0.09 |
| 9 | 215646 | 1613.2 | 0.9999 | 23223 | 0.100 | 0.02 | 0.07 |
| 10 | 219375 | 2241.8 | 0.9998 | 23737 | 0.098 | 0.03 | 0.10 |
| 11 | 449007 | 7443.4 | 0.9977 | 51211 | 0.097 | 0.05 | 0.17 |
| 12 | 478984 | -4450.4 | 0.9997 | 52414 | 0.119 | 0.03 | 0.09 |
| 13 | 487740 | -8918.6 | 0.9996 | 50678 | 0.122 | 0.05 | 0.18 |
| 14 | 483955 | -10094 | 0.9992 | 50298 | 0.125 | 0.06 | 0.21 |
| 15 | 434305 | -497.22 | 0.9985 | 49874 | 0.116 | 0.00 | 0.01 |
| 16 | 435280 | 1510.4 | 0.9999 | 47874 | 0.107 | 0.01 | 0.03 |
| 17 | 435599 | -3483.4 | 0.9973 | 48885 | 0.120 | 0.02 | 0.08 |
| 18 | 424219 | -4209.1 | 0.9962 | 49029 | 0.125 | 0.03 | 0.10 |
| 19 | 412743 | -4192.6 | 0.9962 | 47928 | 0.126 | 0.03 | 0.10 |
| 20 | 413020 | 1145.1 | 0.9991 | 47838 | 0.113 | 0.01 | 0.03 |
| 21 | 472865 | 42338 | 0.9957 | 106051 | 0.135 | 0.27 | 0.90 |
| 22 | 475941 | 35782 | 0.9962 | 104571 | 0.145 | 0.23 | 0.75 |
| 23 | 480198 | 25594 | 0.9961 | 53825 | 0.059 | 0.16 | 0.53 |
| 24 | 472294 | 12103 | 0.9992 | 75231 | 0.134 | 0.08 | 0.26 |
| 25 | 462248 | 25213 | 0.9912 | 47503 | 0.048 | 0.16 | 0.55 |
| 26 | 384150 | 60020 | 0.9979 | 74259 | 0.037 | 0.47 | 1.56 |
| 27 | 473492 | 17978 | 0.995 | 49929 | 0.067 | 0.11 | 0.38 |
| 28 | 478807 | 25523 | 0.9943 | 84476 | 0.123 | 0.16 | 0.53 |
| 29 | 487668 | 3590.6 | 0.9998 | 51653 | 0.099 | 0.02 | 0.07 |
| 30 | 493572 | -4341.1 | 0.9972 | 48948 | 0.108 | 0.03 | 0.09 |
| 31 | 481015 | -2374.2 | 0.9993 | 46702 | 0.102 | 0.01 | 0.05 |
| 32 | 497638 | 8719.1 | 0.9991 | 46081 | 0.075 | 0.05 | 0.18 |
| 33 | 499586 | 7091.6 | 0.9984 | 45783 | 0.077 | 0.04 | 0.14 |
| 34 | 497138 | 6481.8 | 0.9979 | 44011 | 0.075 | 0.04 | 0.13 |
| 35 | 478582 | 7702.8 | 0.9978 | 45414 | 0.079 | 0.05 | 0.16 |
| 36 | 484669 | 13479 | 0.9962 | 41242 | 0.057 | 0.08 | 0.28 |
| 37 | 467450 | 19251 | 0.9965 | 43218 | 0.051 | 0.12 | 0.41 |
| 38 | 488638 | 8063.4 | 0.9985 | 39500 | 0.064 | 0.05 | 0.17 |
| Average | 399880 ± 114042 | 8174 ± 14527 | 0.9980  ± 0.0019 | **Precision %** | | 0.07  ±  0.09 | 0.24  ±  0.30 |
| -3.22 | |

**Table S5** Calibration Curves Equations Obtained for High Alcohol Range (1.0% - 10.0%).

| **No** | **Slope** | **Y-Intercept** | **R2** | **Lowest Concentration Peak Area (1.0%)** | **Calculated Lowest Calculation (0.1%)** | **LOD**  **(% v/v)** | **LOQ**  **(% v/v)** |
| --- | --- | --- | --- | --- | --- | --- | --- |
| 1 | 211622 | 17478 | 0.9974 | 222362 | 0.97 | 0.25 | 0.83 |
| 2 | 203481 | 26890 | 0.9950 | 217620 | 0.94 | 0.40 | 1.32 |
| 3 | 203364 | 18860 | 0.9962 | 216146 | 0.97 | 0.28 | 0.93 |
| 4 | 460569 | 19647 | 0.9985 | 474900 | 0.99 | 0.13 | 0.43 |
| 5 | 471571 | -21376 | 0.9994 | 465364 | 1.03 | 0.14 | 0.45 |
| 6 | 461726 | 2885.2 | 0.9992 | 472154 | 1.02 | 0.02 | 0.06 |
| 7 | 455995 | 2034.7 | 0.9994 | 463225 | 1.01 | 0.01 | 0.04 |
| 8 | 476924 | 35805 | 0.9987 | 518887 | 1.01 | 0.23 | 0.75 |
| 9 | 431582 | 47044 | 0.999 | 505863 | 1.06 | 0.33 | 1.09 |
| 10 | 420437 | 45980 | 0.9992 | 479273 | 1.03 | 0.33 | 1.09 |
| 11 | 413566 | 36114 | 0.9987 | 473115 | 1.06 | 0.26 | 0.87 |
| 12 | 415054 | 19567 | 0.9997 | 457547 | 1.06 | 0.14 | 0.47 |
| 13 | 410688 | 35949 | 0.9993 | 478883 | 1.08 | 0.26 | 0.88 |
| 14 | 464166 | 31175 | 0.9997 | 513044 | 1.04 | 0.20 | 0.67 |
| 15 | 466495 | 23323 | 0.9992 | 515396 | 1.05 | 0.15 | 0.50 |
| Average | 397816 ± 101711 | 22758 ± 18077 | 0.9986  ± 0.0014 | **RSD %** | | 0.21 ±  0.11 | 0.69 ±  0.37 |
| 2.09 | |

**Table S6** Correlation matrix of physicochemical parameters during the alcoholic fermentation stage.

| **Correlation Matrixa** | | | | | |
| --- | --- | --- | --- | --- | --- |
|  | | Ethanol | Sucrose | pH | TDS |
| Correlation | Ethanol | 1.000 | -.934 | -.597 | .895 |
| Sucrose | -.934 | 1.000 | .691 | -.929 |
| pH | -.597 | .691 | 1.000 | -.788 |
| TDS | .895 | -.929 | -.788 | 1.000 |
| Sig. (1-tailed) | Ethanol |  | <.001 | .001 | <.001 |
| Sucrose | .000 |  | .000 | .000 |
| pH | .001 | .000 |  | .000 |
| TDS | .000 | .000 | .000 |  |
| a. Determinant = .005 | | | | | |

**Table S7** Correlation matrix of physicochemical parameters during the post-alcoholic fermentation stage.

| **Correlation Matrixa** | | | | | |
| --- | --- | --- | --- | --- | --- |
|  | | Ethanol | Sucrose | pH | TDS |
| Correlation | Ethanol | 1.000 | .376 | .087 | -.587 |
| Sucrose | .376 | 1.000 | -.543 | -.736 |
| pH | .087 | -.543 | 1.000 | .380 |
| TDS | -.587 | -.736 | .380 | 1.000 |
| Sig. (1-tailed) | Ethanol |  | <.001 | .098 | <.001 |
| Sucrose | .000 |  | .000 | .000 |
| pH | .098 | .000 |  | .000 |
| TDS | .000 | .000 | .000 |  |
| a. Determinant = .174 | | | | | |
